# Supplementary material for: Tracking POPs in Global Air from the First 10 Years of the GAPS Network (2005 to 2014)
Source: PubMed Central journal article supplement — Environ Sci Technol. 2021 Jul 2;55(14):9479–88. doi: 10.1021/acs.est.1c01705 (PMC8296682; doi:10.1021/acs.est.1c01705), 2021-07-02
Supplement: es1c01705_si_001.pdf [file es1c01705_si_001.pdf]

# Tracking POPs in Global Air from the first 10 years of the GAPS Network (2005 to 2014)

## Supplementary Information

Jasmin K Schuster<sup>1\*</sup>, Tom Harner<sup>1</sup>, Anita Eng<sup>1</sup>, Cassandra Rauert<sup>1,2</sup>, Ky Su<sup>1</sup>, Keri C. Hornbuckle<sup>3</sup>, Connor W. Johnson<sup>3</sup>

<sup>1</sup> Air Quality Processes Research Section, Environment and Climate Change Canada, Toronto, Ontario, M3H 5T4, Canada

<sup>2</sup> Queensland Alliance for Environmental Health Sciences (QAEHS), The University of Queensland, Woolloongabba, Queensland, 4102, Australia

<sup>3</sup> Department of Civil and Environmental Engineering and IHR-Hydrosience and Engineering, The University of Iowa, Iowa City, Iowa 52242, United States of America

\*jasmin.schuster@canada.ca

### Contents

|                                                                                                                                                                                                                |     |
|----------------------------------------------------------------------------------------------------------------------------------------------------------------------------------------------------------------|-----|
| Figure S1. Timeline for compounds listed under the Stockholm Convention on POPs.....                                                                                                                           | S1  |
| Figure S2. Map of all GAPS sites.....                                                                                                                                                                          | S2  |
| Text S1. Effective air volume calculation .....                                                                                                                                                                | S3  |
| Figure S3. Comparison between $R_{DC}$ and $R_{model}$ .....                                                                                                                                                   | S5  |
| Figure S4. Bee swarm-boxplot-summary of the range of global concentrations of $\Sigma_7$ PCB, $\alpha$ -HCH, $\gamma$ -HCH, Endosulfan I, Endosulfan II and Endosulfan SO <sub>4</sub> for GAPS 2005-2006..... | S6  |
| Figure S5. Bee swarm-boxplot-summary of the range of global concentrations of the individual PCB congener PCB 28/52/101/118/138/153/180.....                                                                   | S7  |
| Figure S5a. Global concentrations resolved by site type for GAPS 2005-2007 and GAPS 2011/2014.....                                                                                                             | S7  |
| Figure S5b. Global concentrations resolved by UNEP regional group for GAPS 2005-2007 and GAPS 2011/2014..                                                                                                      | S8  |
| Figure S6. Bee swarm-boxplot-summary of the range of global concentrations of Dieldrin .....                                                                                                                   | S9  |
| Figure S6a. Global concentrations resolved by site type for GAPS 2005-2007 and GAPS 2011/2014.....                                                                                                             | S9  |
| Figure S6b. Global concentrations resolved by UNEP regional group for GAPS 2005-2007 and GAPS 2011/2014                                                                                                        | S10 |
| Figure S7. Bee swarm-boxplot-summary of the range of global concentrations of <i>cis</i> -Chlordane, <i>trans</i> -Chlordane, <i>trans</i> -Nonachlor, Heptachlor and Heptachlor epoxide .....                 | S11 |
| Figure S7a. Global concentrations resolved by site type for GAPS 2005-2007 and GAPS 2011/2014 .....                                                                                                            | S11 |
| Figure S7b. Global concentrations resolved by UNEP regional group for GAPS 2005-2007 and GAPS 2011/2014                                                                                                        | S12 |
| Figure S8. Bee swarm-boxplot-summary of the $\alpha$ -HCH fractions .....                                                                                                                                      | S13 |
| Figure S9. Bee swarm-boxplot-summary of the Endosulfan I fractions .....                                                                                                                                       | S14 |
| Figure S10. Bee swarm-boxplot-summary of the temporal trend slopes of the individual PCB congeners PCB 28, PCB 52, PCB 101, PCB 118, PCB 153 and PCB 180 2005-2014 .....                                       | S15 |

## SI - Tracking POPs in Global Air from the first 10 years of the GAPS Network (2005 to 2014)

|                                                                                                                                                                                                  |     |
|--------------------------------------------------------------------------------------------------------------------------------------------------------------------------------------------------|-----|
| Figure S11. Bee swarm-boxplot-summary of the temporal trend slopes of Dieldrin 2005-2014.....                                                                                                    | S16 |
| Figure S12. Bee swarm-boxplot-summary of the temporal trend slopes of <i>cis</i> -Chlordane, <i>trans</i> -Chlordane, <i>trans</i> -Nonachlor, Heptachlor and Heptachlor epoxide 2005-2014 ..... | S17 |
| Table S1. Halving times of POPs in air reported from other studies.....                                                                                                                          | S18 |
| Figure S13. Global concentrations and decline trends of $\Sigma_7$ PCB 2005-2014 .....                                                                                                           | S21 |
| Figure S14. Global concentrations and decline trends of $\alpha$ -HCH 2005-2014 .....                                                                                                            | S22 |
| Figure S15. Global concentrations and decline trends of $\gamma$ -HCH 2005-2014.....                                                                                                             | S23 |
| Figure S16. Global concentrations and decline trends of Endosulfan I 2005-2014.....                                                                                                              | S24 |
| Figure S17. Global concentrations and decline trends of Endosulfan II 2005-2014.....                                                                                                             | S25 |
| Figure S18. Global concentrations and decline trends of Endosulfan SO <sub>4</sub> 2005-2014 .....                                                                                               | S26 |
| Figure S19. Global concentrations and decline trends of Dieldrin 2005-2014 .....                                                                                                                 | S27 |
| Figure S20. Global concentrations and decline trends of <i>cis</i> -Chlordane 2005-2014 .....                                                                                                    | S28 |
| Figure S21. Global concentrations and decline trends of <i>trans</i> -Chlordane 2005-2014 .....                                                                                                  | S29 |
| Figure S22. Global concentrations and decline trends of <i>trans</i> -Nonachlor 2005-2014.....                                                                                                   | S30 |
| Figure S23. Global concentrations and decline trends of Heptachlor 2005-2014 .....                                                                                                               | S31 |
| Figure S24. Global concentrations and decline trends of Heptachlor epoxide 2005-2014.....                                                                                                        | S32 |
| Table S2. Wilcoxon Rank Sum Test groupings of POPs based on temporal trends .....                                                                                                                | S33 |
| Figure S25. PCA of the temporal trends slopes of all congeners .....                                                                                                                             | S34 |
| Figure S25a. Scores plot .....                                                                                                                                                                   | S34 |
| Figure S25a. Loadings plot .....                                                                                                                                                                 | S35 |
| References .....                                                                                                                                                                                 | S36 |

Figure S1. Timeline for compounds listed under the Stockholm Convention on POPs

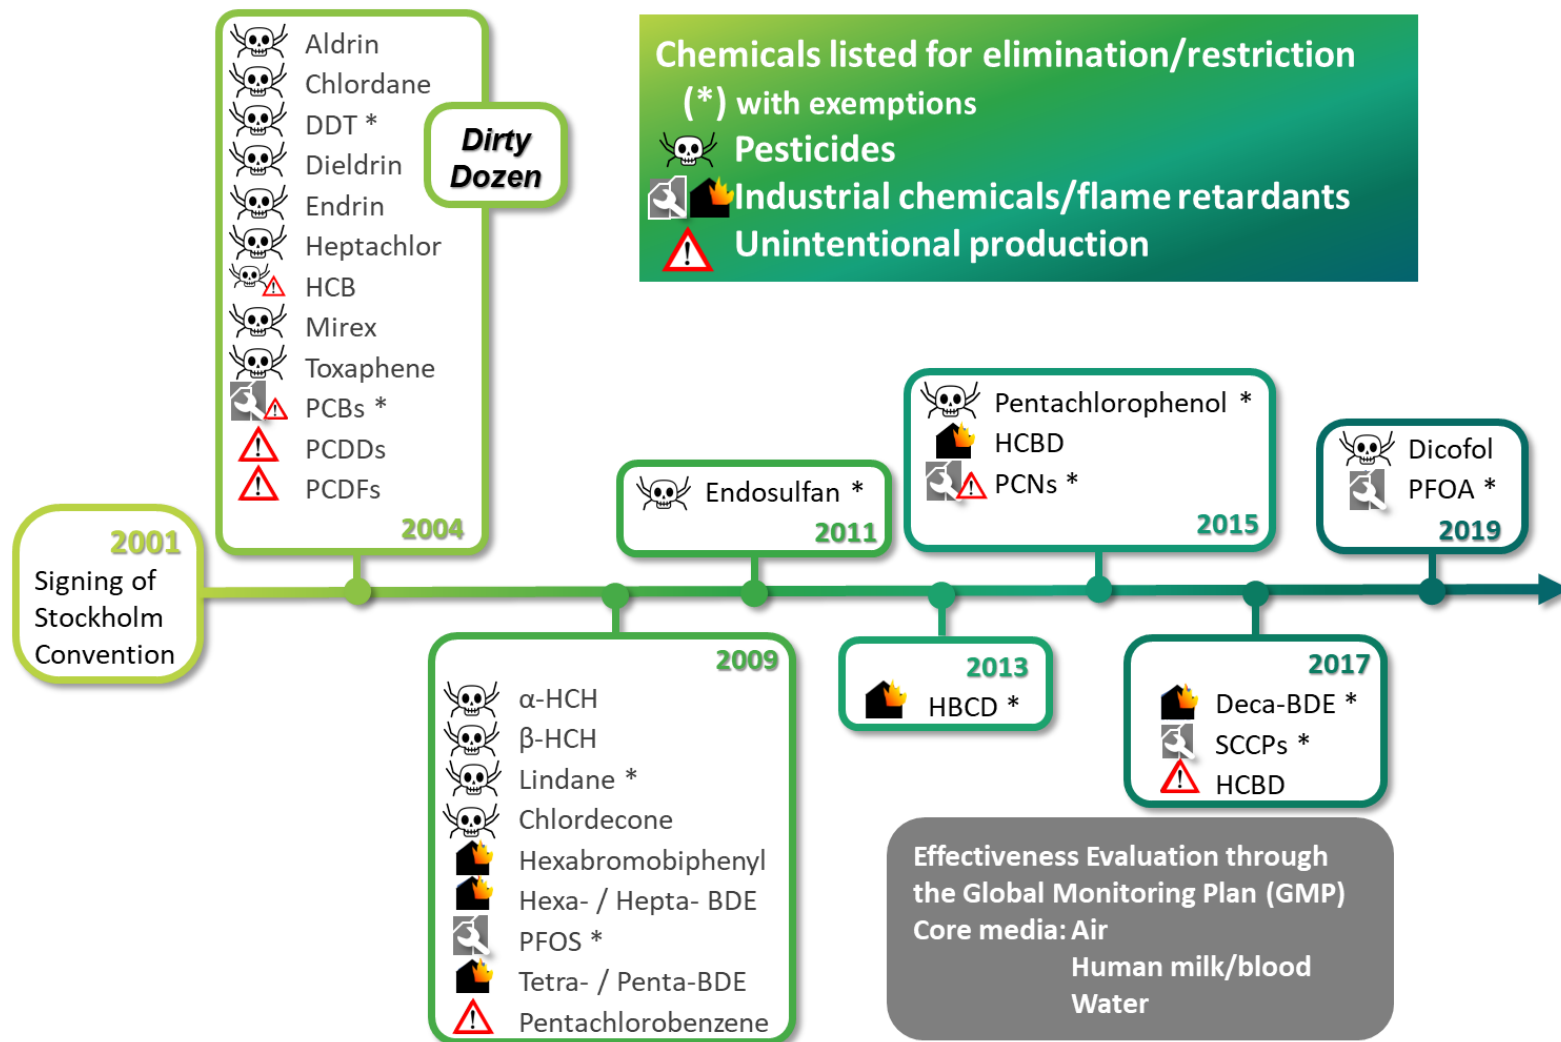

Figure S2. Map of all GAPS sites

Map of all GAPS sites 2005-2014 with Site ID and site names (below). Additional site details are available in an Excel file included in the SI. GAPS sites with long-term POP data for temporal trend analysis are marked yellow. GAPS sites that are in operation as of summer 2021 are marked with a star in the list (★).

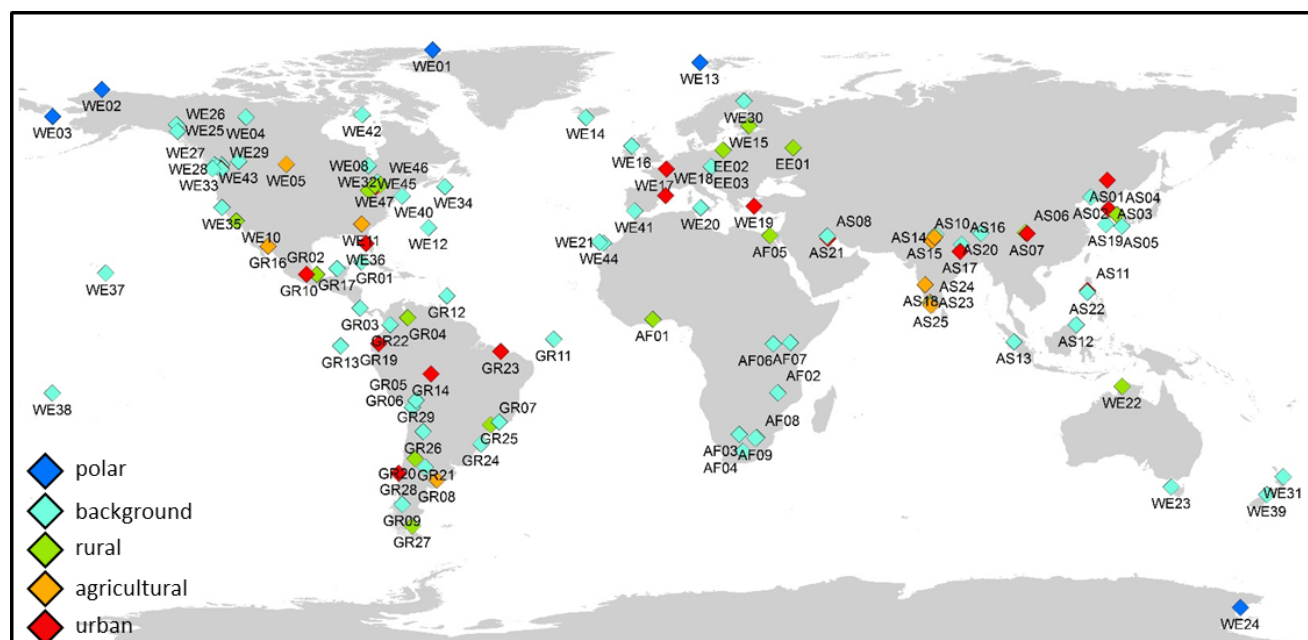

|       |                        |       |                                            |       |                                     |       |                                     |
|-------|------------------------|-------|--------------------------------------------|-------|-------------------------------------|-------|-------------------------------------|
| AF01  | Accra                  | AS20  | Nam Co, Tibet                              | ★GR22 | Manizales                           | WE21  | Telde, Las Palmas                   |
| AF02  | Lilongwe               | ★AS21 | Abdaly                                     | ★GR23 | São Luis do Maranhá                 | ★WE22 | Darwin                              |
| AF03  | Kalahari               | AS22  | Tagaytay City                              | ★GR24 | São Jose dos Ausentes               | ★WE23 | Cape Grim                           |
| ★AF04 | De Aar                 | AS23  | Ooty                                       | ★GR25 | Itatiaia                            | WE24  | Mario Zucchelli Station, Antarctica |
| AF05  | Cairo                  | AS24  | Coimbatore, Tamil Nadu                     | ★GR26 | Salta                               | ★WE25 | Little Fox Lake, Yukon              |
| ★AF06 | Bukasa Island          | AS25  | Aliyar Nagar                               | ★GR27 | Rio Gallegos                        | ★WE26 | Dyea, Alaska                        |
| ★AF07 | Mt. Kenya              | EE01  | Danki                                      | ★GR28 | Concepción                          | WE27  | Cortes Island, British Columbia     |
| AF08  | Vanderbijlpark         | EE02  | Pomlewo (near Gdańsk)                      | ★GR29 | Chacaltaya                          | WE28  | Lasqueti Island, BC                 |
| AF09  | Vredfort Dome          | ★EE03 | Košetice                                   | ★WE01 | Alert, Nunavut                      | WE29  | Saturna Island, British Columbia    |
| AS01  | Harbin, Heilong Jiang  | GR01  | La Palma                                   | ★WE02 | Barrow, Alaska                      | ★WE30 | Pallas                              |
| AS02  | Dalian, Liaoning       | GR02  | Veracruz                                   | WE03  | St. Lawrence Island, Alaska         | WE31  | North Island                        |
| AS03  | Seoul                  | ★GR03 | Tapanti National Park                      | WE04  | Snare Rapids, Northwest Territories | ★WE32 | Fraserdale, ON                      |
| AS04  | Pohang                 | ★GR04 | Arauca                                     | ★WE05 | Bratt's Lake, Saskatchewan          | ★WE33 | Ucluelet, BC                        |
| AS05  | Kumamoto               | GR05  | Huayna Potosí 5200 m a.s.l., La Paz        | ★WE06 | Whistler, British Columbia          | ★WE34 | Sable Island, NS                    |
| AS06  | Mt. Qingcheng, Sichuan | GR06  | Chungara Lake                              | WE07  | Vancouver, British Columbia         | ★WE35 | Point Reyes, CA                     |
| AS07  | Chengdu, Sichuan       | GR07  | Indaiatuba, São Paulo                      | WE08  | Dorset, Ontario                     | ★WE36 | Sydney, Florida                     |
| AS08  | Kuwait City            | GR08  | Bahía Blanca                               | ★WE09 | Downsview, Ontario                  | ★WE37 | Mauna Loa Obs, Hilo, Hawaii         |
| AS09  | East Arjun Nagar       | GR09  | Coyhaique                                  | ★WE10 | Simi Valley, California             | ★WE38 | Tula, American Samoa                |
| AS10  | Bawana                 | GR10  | Tlahuac, Mexico City                       | WE11  | Athens, Georgia                     | ★WE39 | Temple Basin, Arthur's Pass         |
| ★AS11 | Manila                 | GR11  | St. Peter and St. Paul Rocks               | ★WE12 | Tudor Hill                          | ★WE40 | Groton, CT                          |
| ★AS12 | Danum Valley           | ★GR12 | Ragged Point, St. Philip                   | ★WE13 | Ny-Ålesund                          | ★WE41 | Doñana National Park                |
| ★AS13 | Bukit Kototabang       | ★GR13 | Santa Cruz Island (Galapagos Islands)      | ★WE14 | Stórhöfði                           | WE42  | Coral Harbour, NU                   |
| AS14  | Kaddu Khal             | GR14  | Porto Velho                                | WE15  | Hollola                             | ★WE43 | Mount Revelstoke, BC                |
| AS15  | Laksar                 | ★GR16 | Valley of the Yaqui in Sonora              | ★WE16 | Malin Head                          | ★WE44 | Izana                               |
| AS16  | Dhulikhel              | GR17  | Celestún in Yucatan                        | ★WE17 | Paris                               | ★WE45 | Longwoods                           |
| AS17  | Patna                  | ★GR19 | Quito                                      | WE18  | Barcelona                           | ★WE46 | Warsaw Caves                        |
| AS18  | Mudhol                 | ★GR20 | Pierre Auger Observatory (Patagonia Flats) | WE19  | Izmir                               | ★WE47 | Egbert / CARE Station               |
| ★AS19 | Gosan, Jeju Island     | ★GR21 | Mendoza Province                           | WE20  | Isola Marettimo                     |       |                                     |

## Text S1. Effective air volume calculation

With its start in 2005, the GAPS network aimed to deliver global information on POP concentrations in air. PUF-PAS were selected as a cost-effective method with low logistical requirements. Site- and sample-specific sampling rate (R) values were derived from depuration compounds (DCs), that were spiked on the PUF disk prior to deployment. R values were estimated from the loss of DCs during deployment<sup>2</sup>. While DC derived R values reflect the diverse meteorological conditions at the different sampling sites, this method introduces additional uncertainty. It was found that the loss of depuration compounds should be in a window of 20-60% to minimize the influence of the analytical uncertainty<sup>2,6</sup>. Some sites show meteorological conditions (i.e. extreme temperatures and wind speeds) that make it difficult to attain accurate R values based on these requirements.

Herkert et al. developed a model and online tool based on DC-derived sampling rates from the GAPS network and meteorological data. Site and compound specific sampling rates are estimated from sampling dates and location coordinates<sup>3-5</sup>. The resulting model R values are not considerably different between the majority of sites, with 90% of values in the range  $4 \pm 2$  m<sup>3</sup>/day, consistent with previous reporting under the GAPS program (Figure S3). For this paper and going forward all GAPS legacy POP concentrations in air are estimated using these model R values. This reduces the analytical costs associated with DCs and their additional analysis time. It also reduces uncertainty in derived R-values between sampling and processing years and allows the analysis of temporal trends within the GAPS data for the sampling periods 2005-2014. Another environmental benefit to moving away from DCs, is that it eliminates the emission of POPs spiked into the PUF disks to ambient air.

When using the model, some sites showed unexpectedly low sampling rates due to low model wind speeds. It was determined that this is due to the model assuming forest cover, whereas in reality the sites were located in areas cleared of trees, and therefore experience usual wind speeds. Further inspection indicated that this was mainly a problem with coastal and mountain sites that were adjacent to forests. Low model grid resolution had assigned dampened wind speeds more typical for forest-covered areas to these sites.

Sampling rates for these few sites with extremely low modelled wind speed were adjusted based on local wind speed data (NOAA data files<sup>7</sup>) and the wind speed [WS] ~ sampling rate [R] relationship from the modelled data:

SI - Tracking POPs in Global Air from the first 10 years of the GAPS Network (2005 to 2014)

Equation 1.  $R \text{ (m}^3\text{/day)} = 1.6087 * [\text{WS (m/s)}]^{0.6265}$

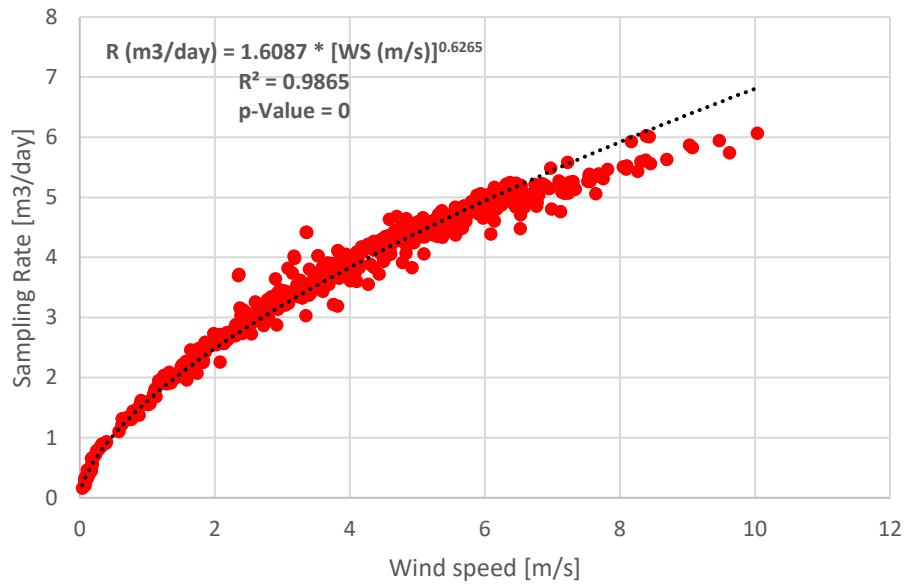

The template based on Shoeib and Harner was used to estimate effective air volumes from the modelled sampling rates<sup>8,9</sup>.

Figure S3. Comparison between  $R_{DC}$  and  $R_{model}$

The average sampling rates for 2011 derived from depuration compounds ( $R_{DC}$ )<sup>2</sup> and from the Herkert et al. online model ( $R_{model}$ )<sup>3-5</sup> are presented at the individual GAPS sites. Details are in Text S1.

Greater discrepancies observed at a few of the polar sites is likely attributed to challenges (e.g. slow off-gassing) with using DCs at colder temperatures.

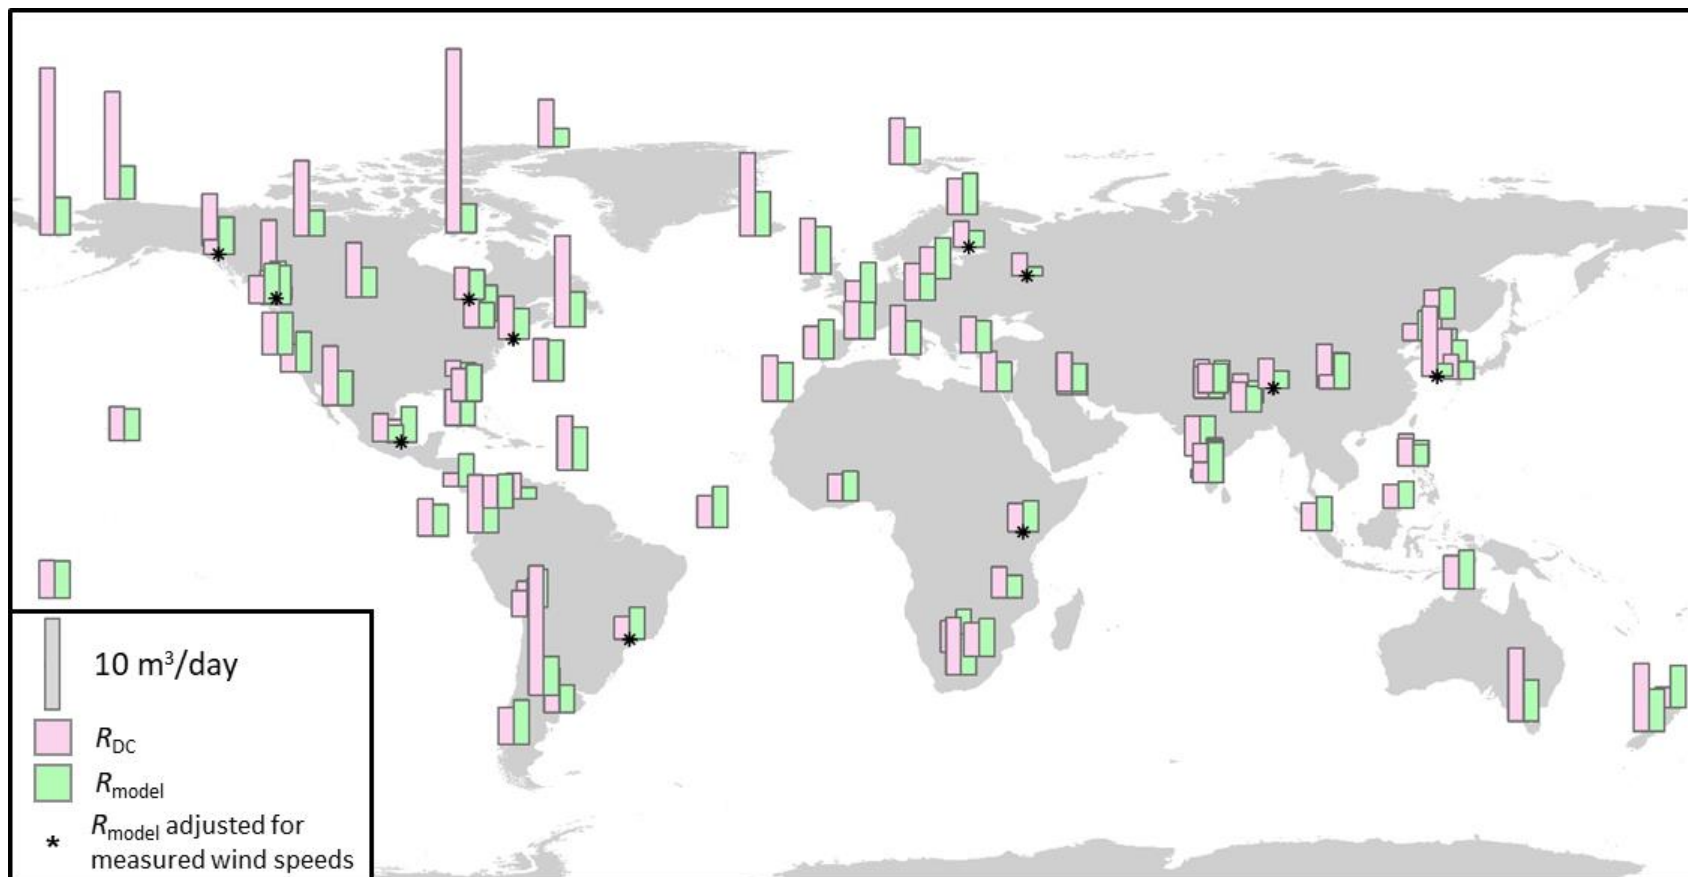

Figure S4. Bee swarm-boxplot-summary of the range of global concentrations of  $\Sigma_7$ PCB,  $\alpha$ -HCH,  $\gamma$ -HCH, Endosulfan I, Endosulfan II and Endosulfan SO<sub>4</sub> for GAPS 2005-2006

The plot depicts the single data points and the boxplots marking the median, 25th and 75th percentile (whiskers marking the 10th and 90th percentile).

Site types: PO= polar, BA = background, RU = rural, AG = agricultural, UR = urban

UNEP regional groups: Africa = African Group, Asia = Asia and Pacific Group, CEE = Central and Eastern European Group, GRULAC = Group of Latin America and Caribbean countries, WEOG = Western European and Others Group

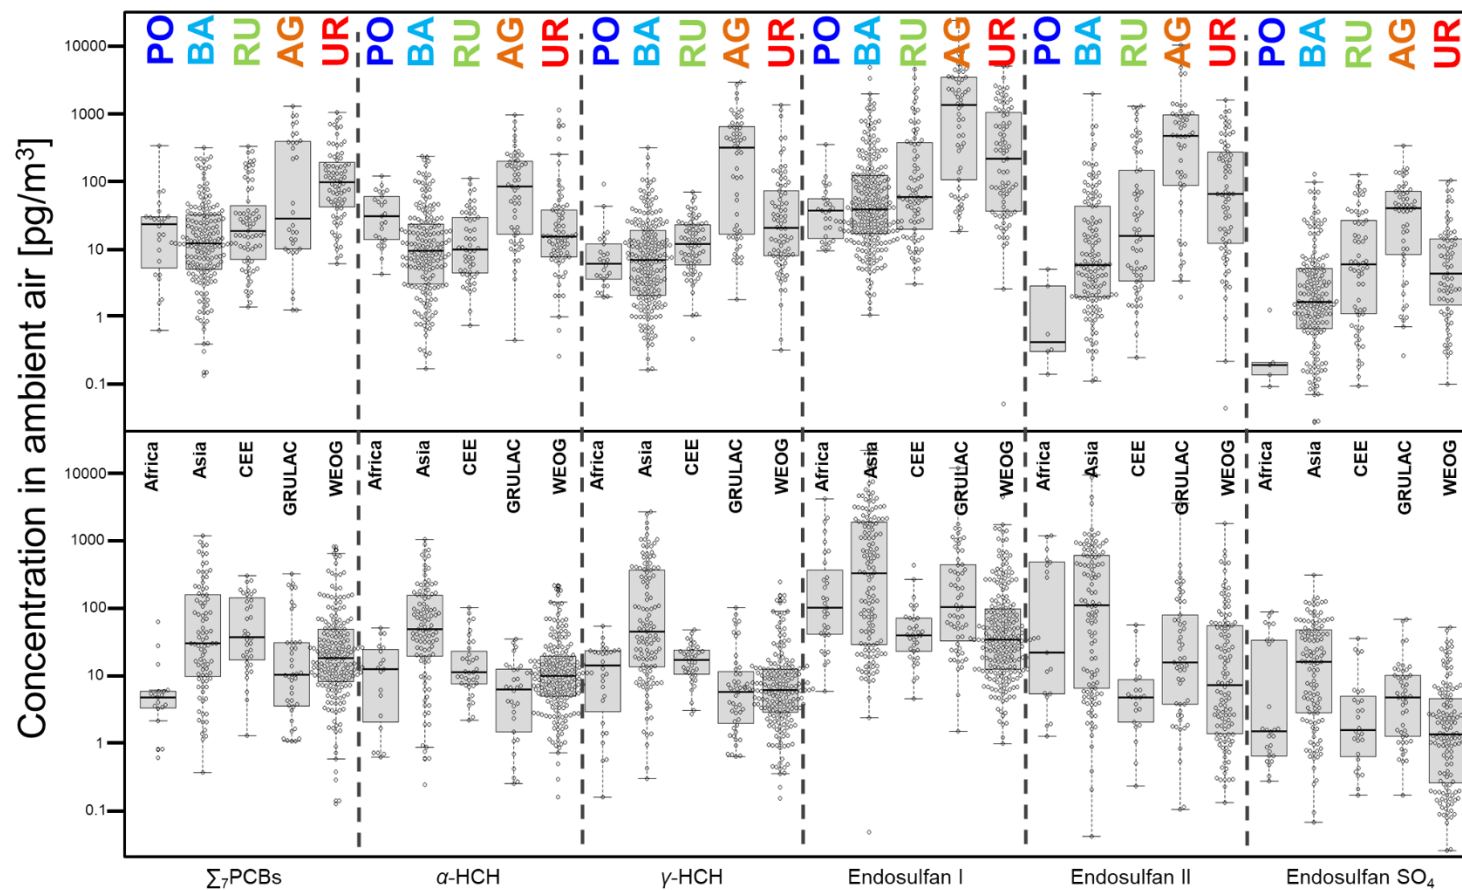



Figure S5. Bee swarm-boxplot-summary of the range of global concentrations of the individual PCB congener PCB 28/52/101/118/138/153/180

Figure S5a. Global concentrations resolved by site type for GAPS 2005-2007 and GAPS 2011/2014

The plot depicts the single data points and the boxplots marking the median, 25th and 75th percentile (whiskers marking the 10th and 90th percentile).

Site types: PO= polar, BA = background, RU = rural, AG = agricultural, UR = urban

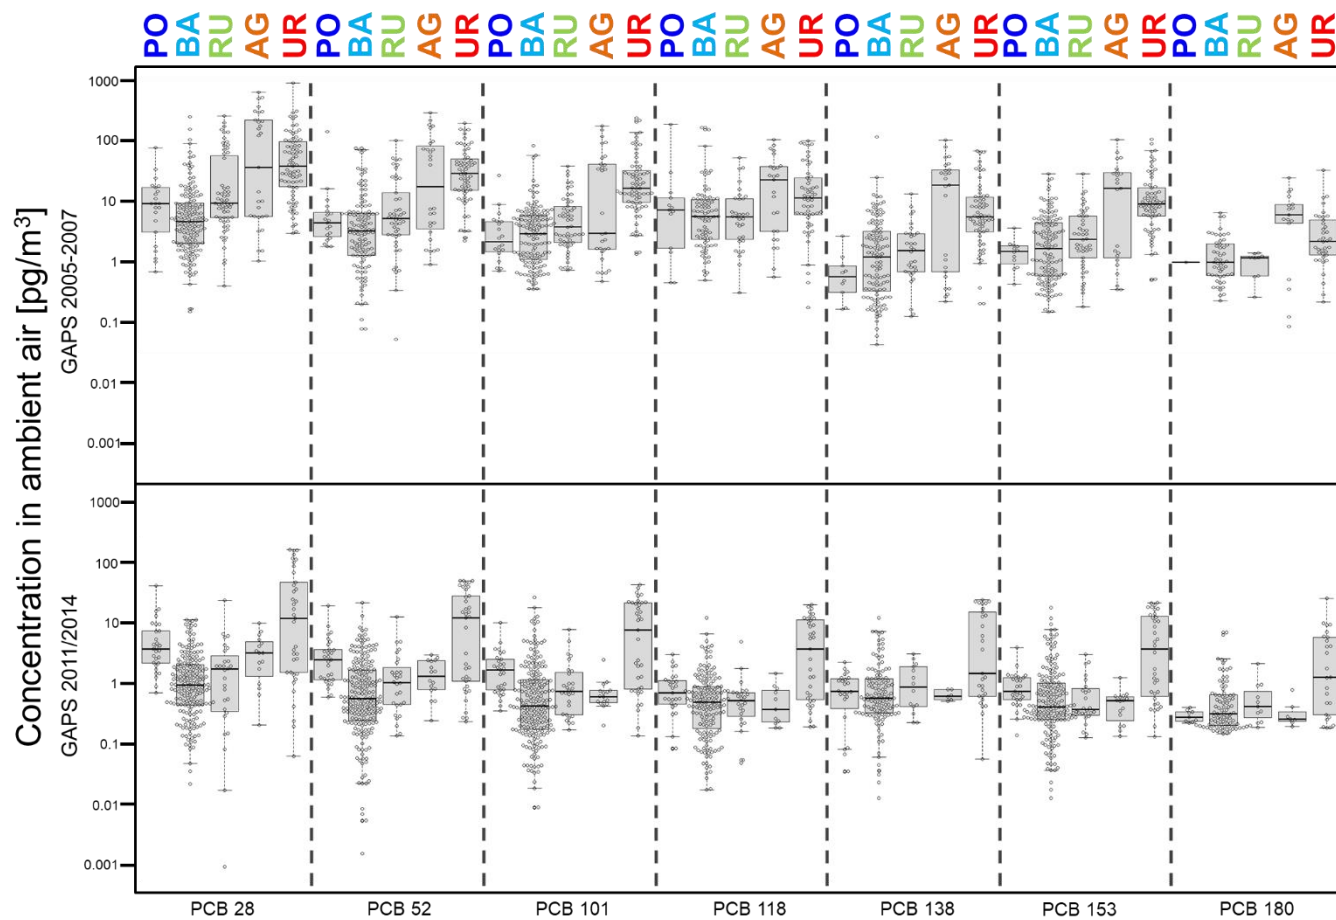

SI - Tracking POPs in Global Air from the first 10 years of the GAPS Network (2005 to 2014)

Figure S5b. Global concentrations resolved by UNEP regional group for GAPS 2005-2007 and GAPS 2011/2014

The plot depicts the single data points and the boxplots marking the median, 25th and 75th percentile (whiskers marking the 10th and 90th percentile).

UNEP regional groups: Africa = African Group, Asia = Asia and Pacific Group, CEE = Central and Eastern European Group, GRULAC = Group of Latin America and Caribbean countries, WEOG = Western European and Others Group

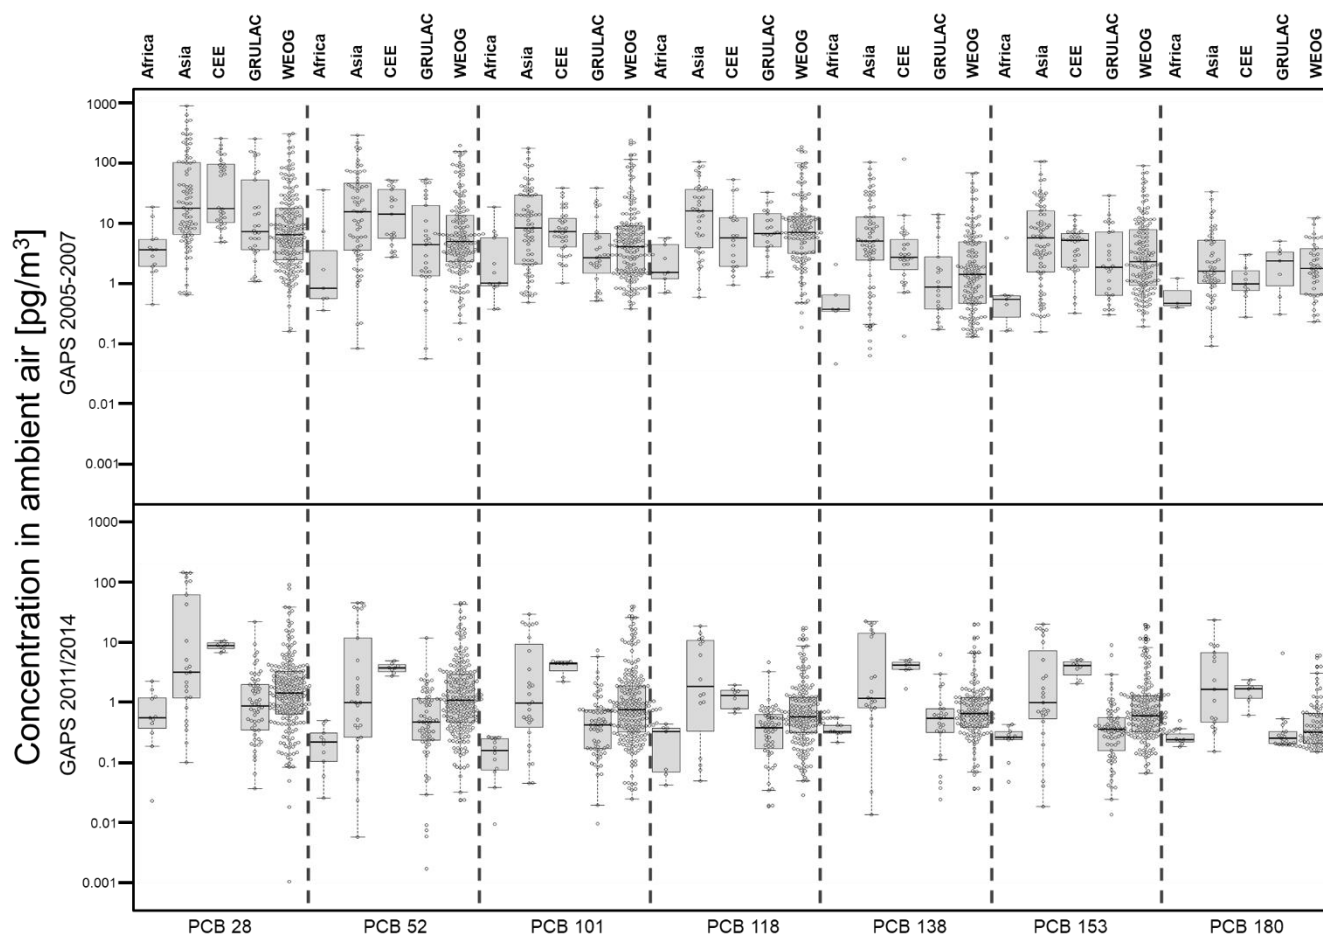

## Figure S6. Bee swarm-boxplot-summary of the range of global concentrations of Dieldrin

Figure S6a. Global concentrations resolved by site type for GAPS 2005-2007 and GAPS 2011/2014

The plot depicts the single data points and the boxplots marking the median, 25th and 75th percentile (whiskers marking the 10th and 90th percentile).

Site types: PO= polar, BA = background, RU = rural, AG = agricultural, UR = urban

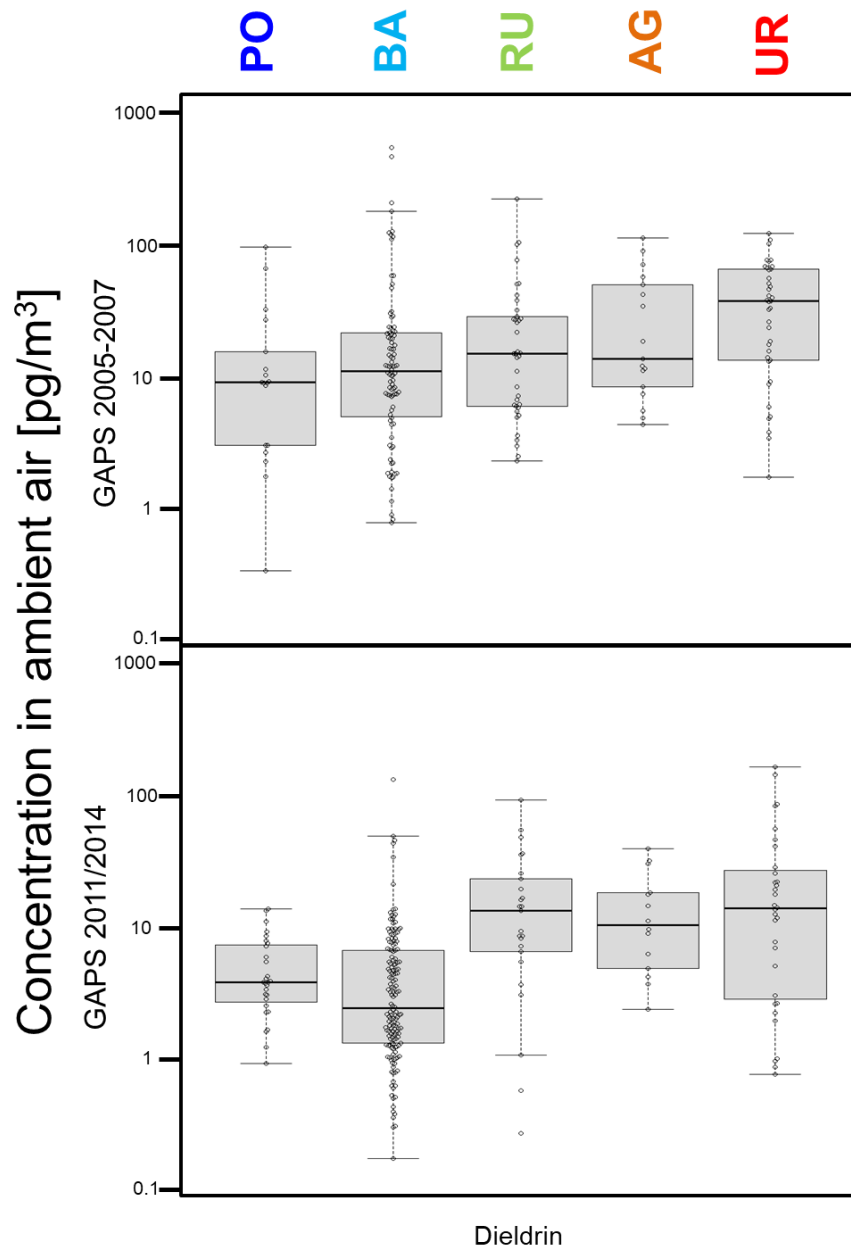

Figure S6b. Global concentrations resolved by UNEP regional group for GAPS 2005-2007 and GAPS 2011/2014

The plot depicts the single data points and the boxplots marking the median, 25th and 75th percentile (whiskers marking the 10th and 90th percentile).

UNEP regional groups: Africa = African Group, Asia = Asia and Pacific Group, CEE = Central and Eastern European Group, GRULAC = Group of Latin America and Caribbean countries, WEOG = Western European and Others Group

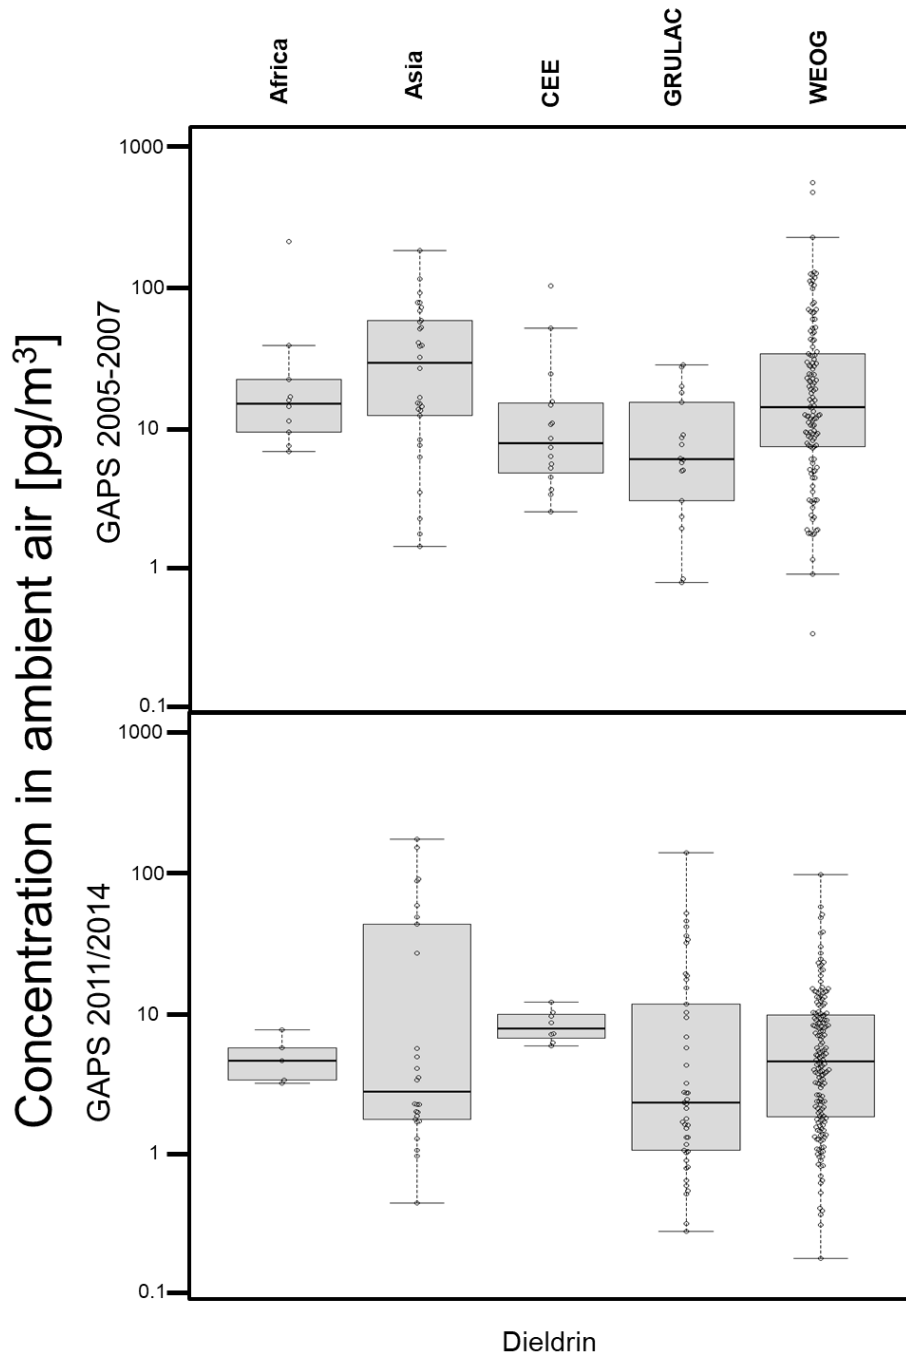

Figure S7. Bee swarm-boxplot-summary of the range of global concentrations of *cis*-Chlordane, *trans*-Chlordane, *trans*-Nonachlor, Heptachlor and Heptachlor epoxide

Figure S7a. Global concentrations resolved by site type for GAPS 2005-2007 and GAPS 2011/2014

The plot depicts the single data points and the boxplots marking the median, 25th and 75th percentile (whiskers marking the 10th and 90th percentile).

Site types: PO= polar, BA = background, RU = rural, AG = agricultural, UR = urban

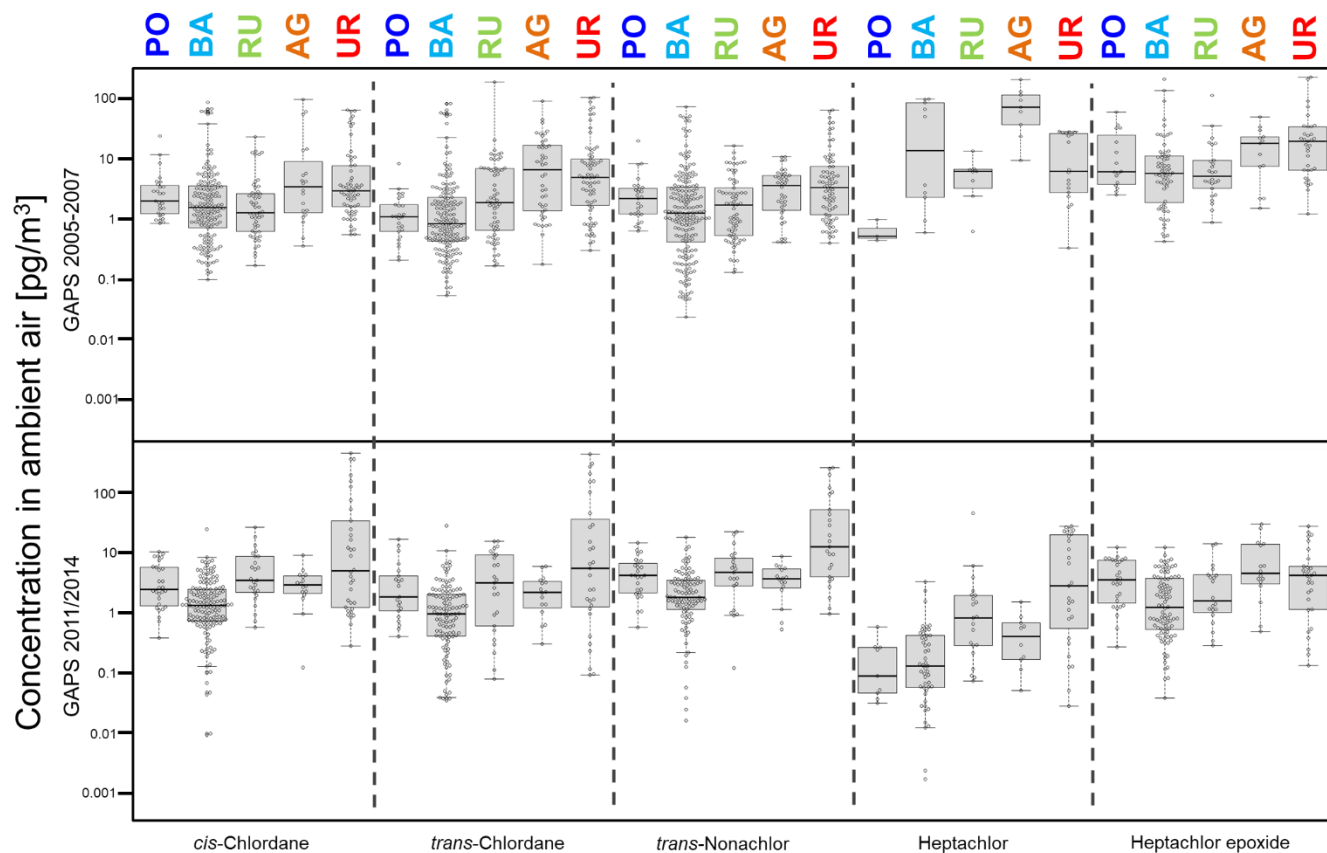

SI - Tracking POPs in Global Air from the first 10 years of the GAPS Network (2005 to 2014)

Figure S7b. Global concentrations resolved by UNEP regional group for GAPS 2005-2007 and GAPS 2011/2014

The plot depicts the single data points and the boxplots marking the median, 25th and 75th percentile (whiskers marking the 10th and 90th percentile).

UNEP regional groups: Africa = African Group, Asia = Asia and Pacific Group, CEE = Central and Eastern European Group, GRULAC = Group of Latin America and Caribbean countries, WEOG = Western European and Others Group

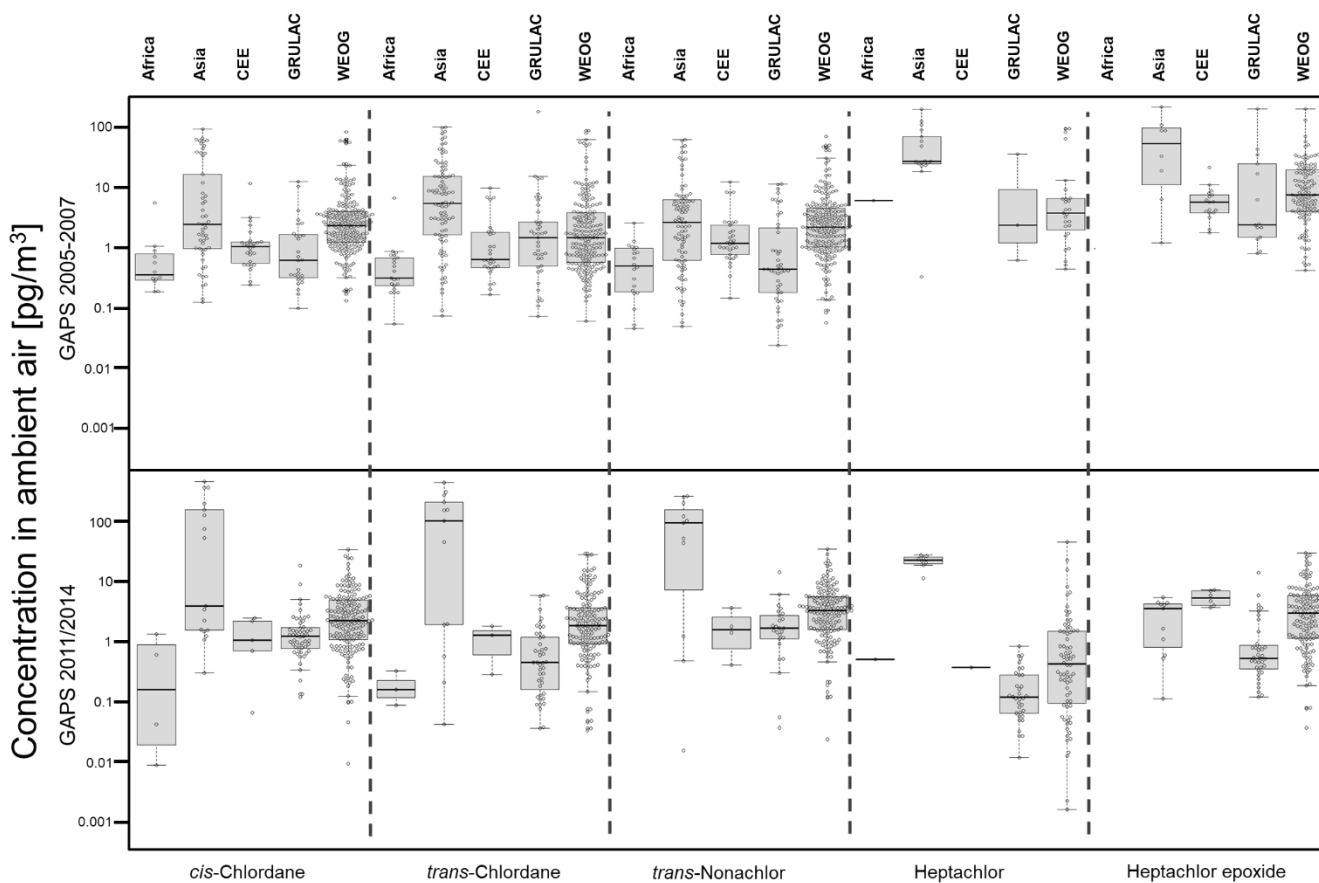

### Figure S8. Bee swarm-boxplot-summary of the $\alpha$ -HCH fractions

The fraction of  $\alpha$ -HCH was estimated for GAPS 2005-2007 and GAPS 2011/2014 for all samples with both  $\alpha$ -HCH and  $\gamma$ -HCH above MDL. The plot depicts the single data points and the boxplots marking the median, 25th and 75th percentile (whiskers marking the 10th and 90th percentile).

Site types: PO= polar, BA = background, RU = rural, AG = agricultural, UR = urban

UNEP regional groups: Africa = African Group, Asia = Asia and Pacific Group, CEE = Central and Eastern European Group, GRULAC = Group of Latin America and Caribbean countries, WEOG = Western European and Others Group

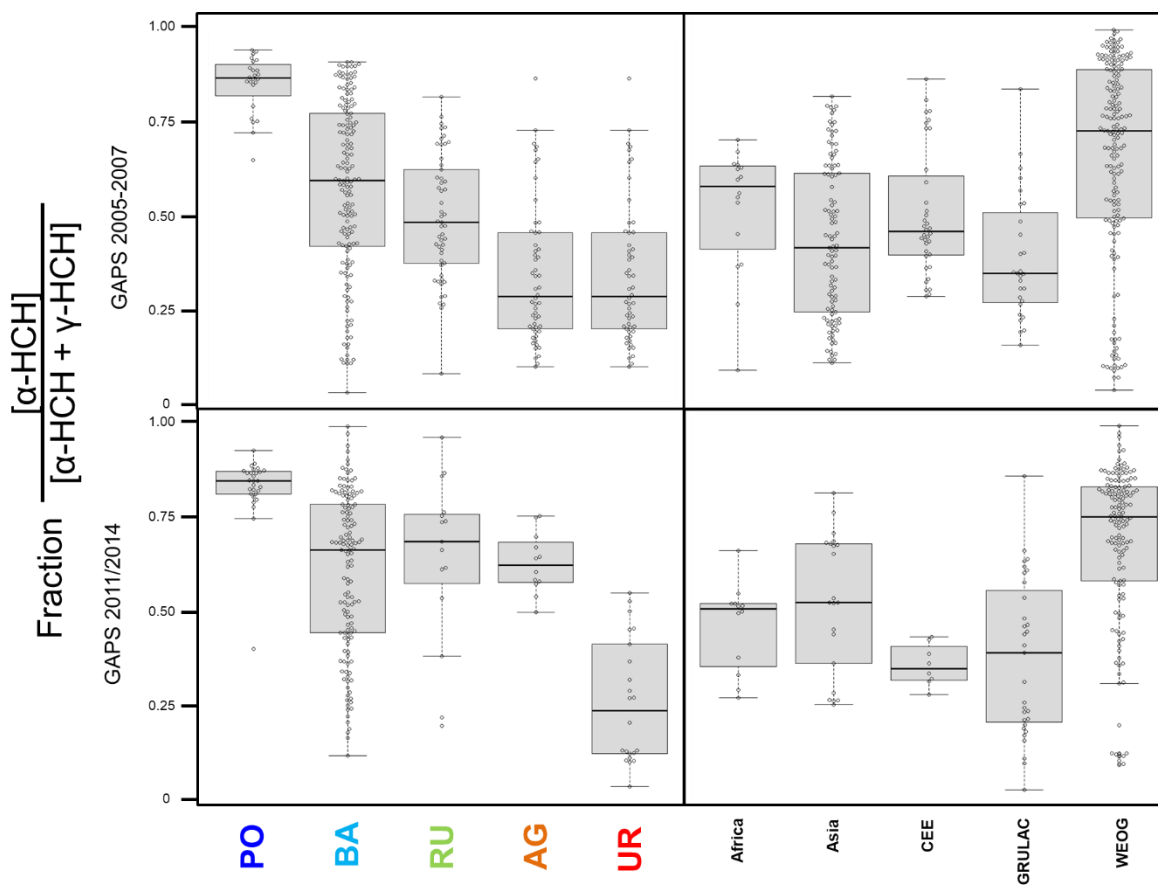

### Figure S9. Bee swarm-boxplot-summary of the Endosulfan I fractions

The fraction of Endosulfan I was estimated for GAPS 2005-2007 and GAPS 2011/2014 for all samples with both Endosulfan I and Endosulfan II above MDL. The plot depicts the single data points and the boxplots marking the median, 25th and 75th percentile (whiskers marking the 10th and 90th percentile).

Site types: PO= polar, BA = background, RU = rural, AG = agricultural, UR = urban

UNEP regional groups: Africa = African Group, Asia = Asia and Pacific Group, CEE = Central and Eastern European Group, GRULAC = Group of Latin America and Caribbean countries, WEOG = Western European and Others Group

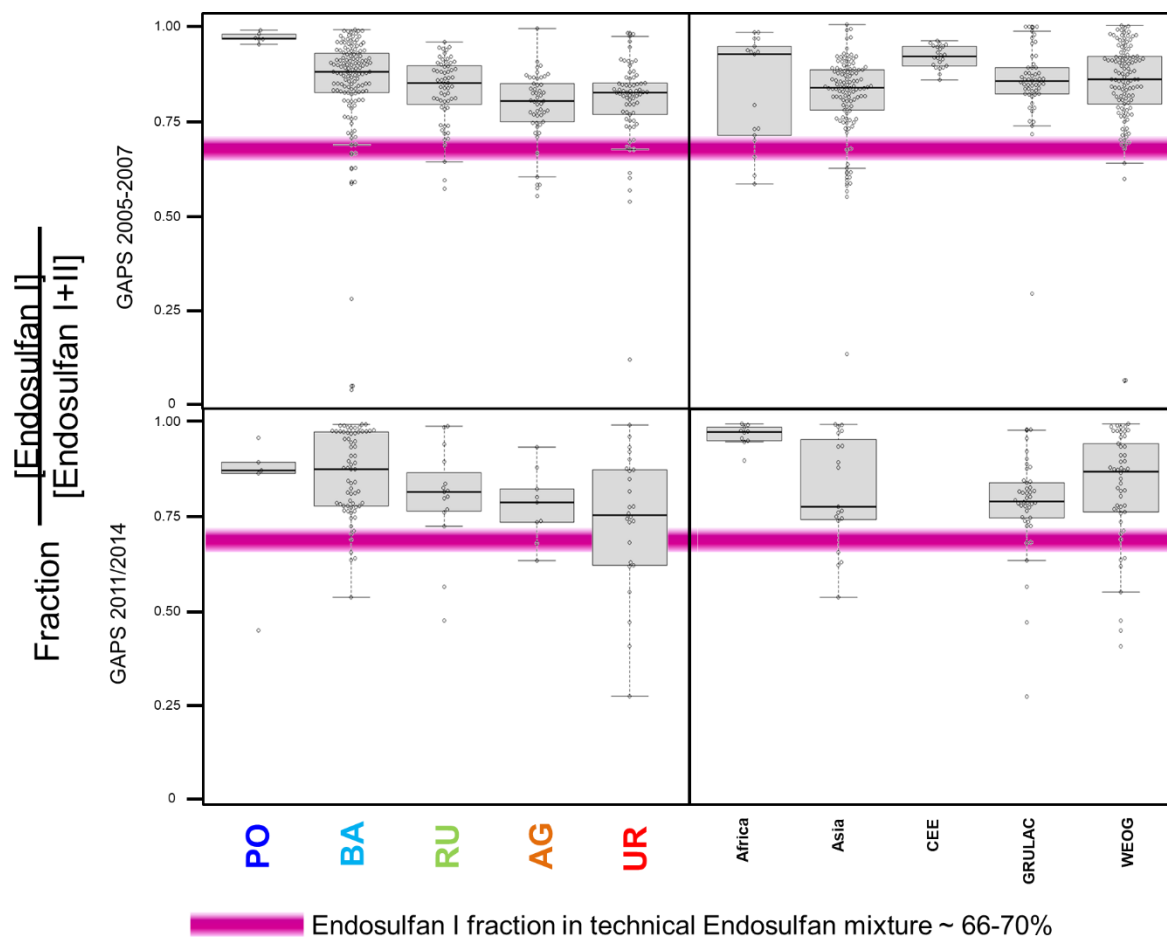



Figure S10. Bee swarm-boxplot-summary of the temporal trend slopes of the individual PCB congeners PCB 28, PCB 52, PCB 101, PCB 118, PCB 153 and PCB 180 2005-2014

The temporal trend slopes were estimated with Theil-Sen regression for the 40 GAPS sites with sufficient data. The plot depicts the single data points and the boxplots marking the median, 25th and 75th percentile (whiskers marking the 10th and 90th percentile). The windows for halving/doubling times estimated from the temporal trend slopes following first order kinetics are marked in the graph.

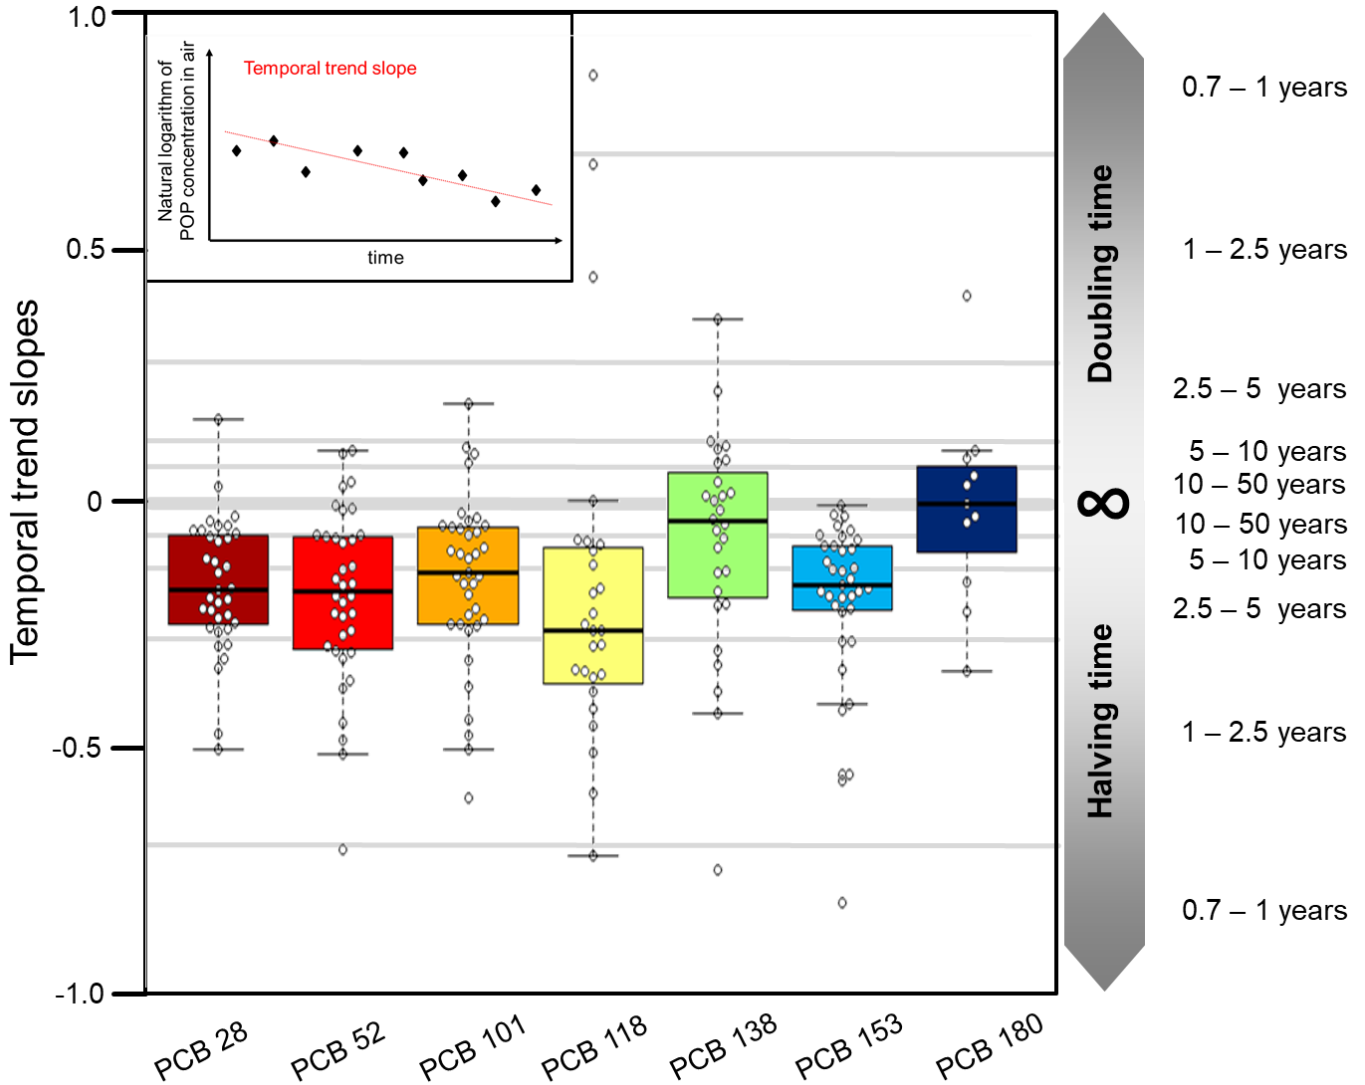

Figure S11. Bee swarm-boxplot-summary of the temporal trend slopes of Dieldrin 2005-2014

The temporal trend slopes were estimated with Theil-Sen regression for the 40 GAPS sites with sufficient data. The plot depicts the single data points and the boxplots marking the median, 25th and 75th percentile (whiskers marking the 10th and 90th percentile). The windows for halving/doubling times estimated from the temporal trend slopes following first order kinetics are marked in the graph.

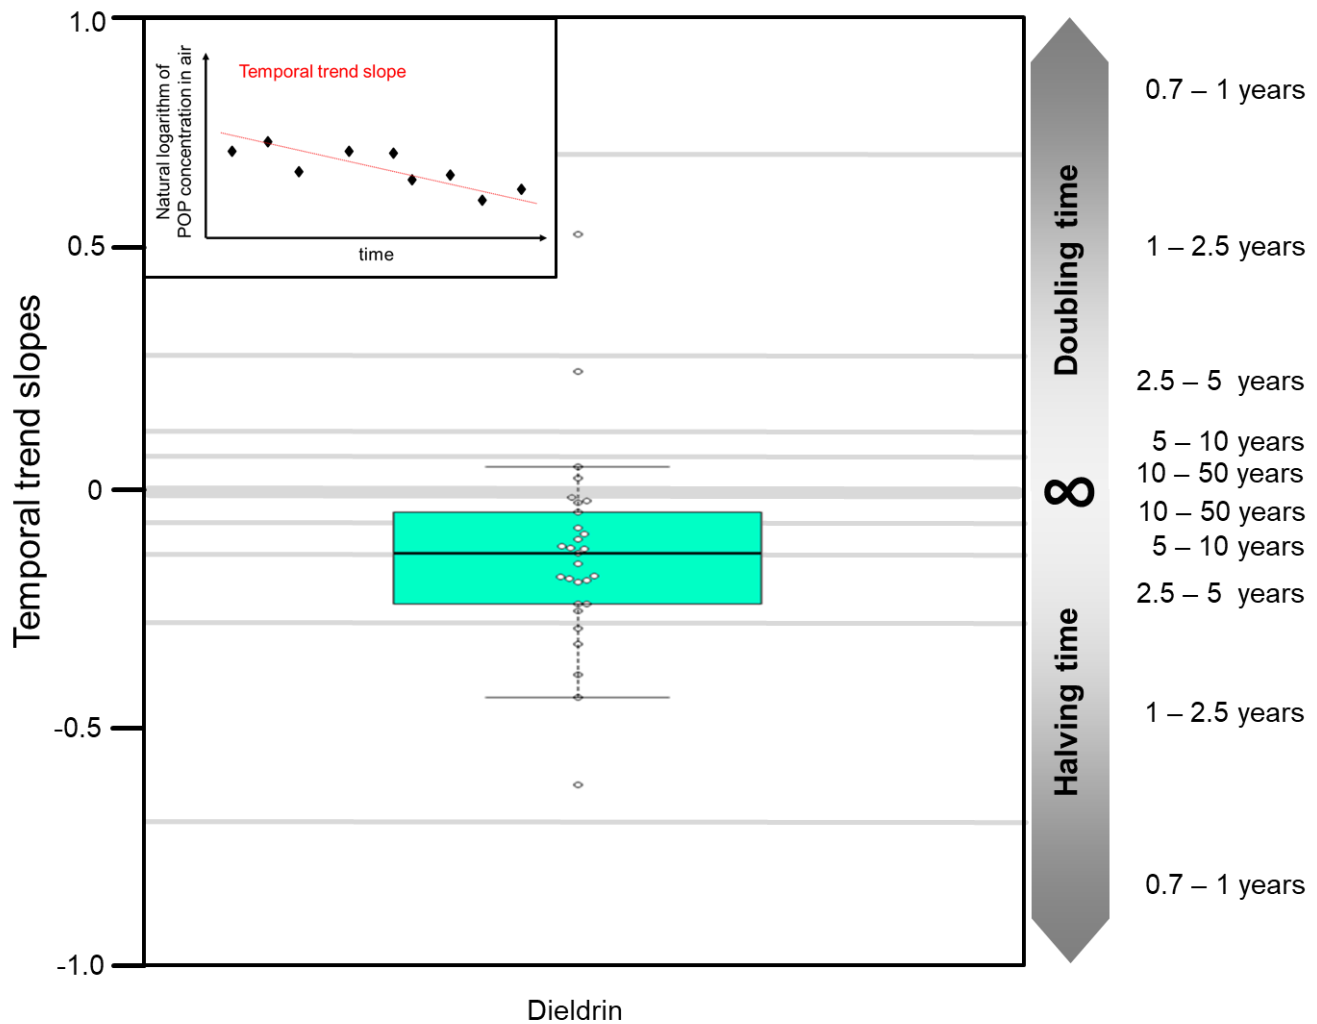

Figure S12. Bee swarm-boxplot-summary of the temporal trend slopes of *cis*-Chlordane, *trans*-Chlordane, *trans*-Nonachlor, Heptachlor and Heptachlor epoxide 2005-2014

The temporal trend slopes were estimated with Theil-Sen regression for the 40 GAPS sites with sufficient data. The plot depicts the single data points and the boxplots marking the median, 25th and 75th percentile (whiskers marking the 10th and 90th percentile). The windows for halving/doubling times estimated from the temporal trend slopes following first order kinetics are marked in the graph.

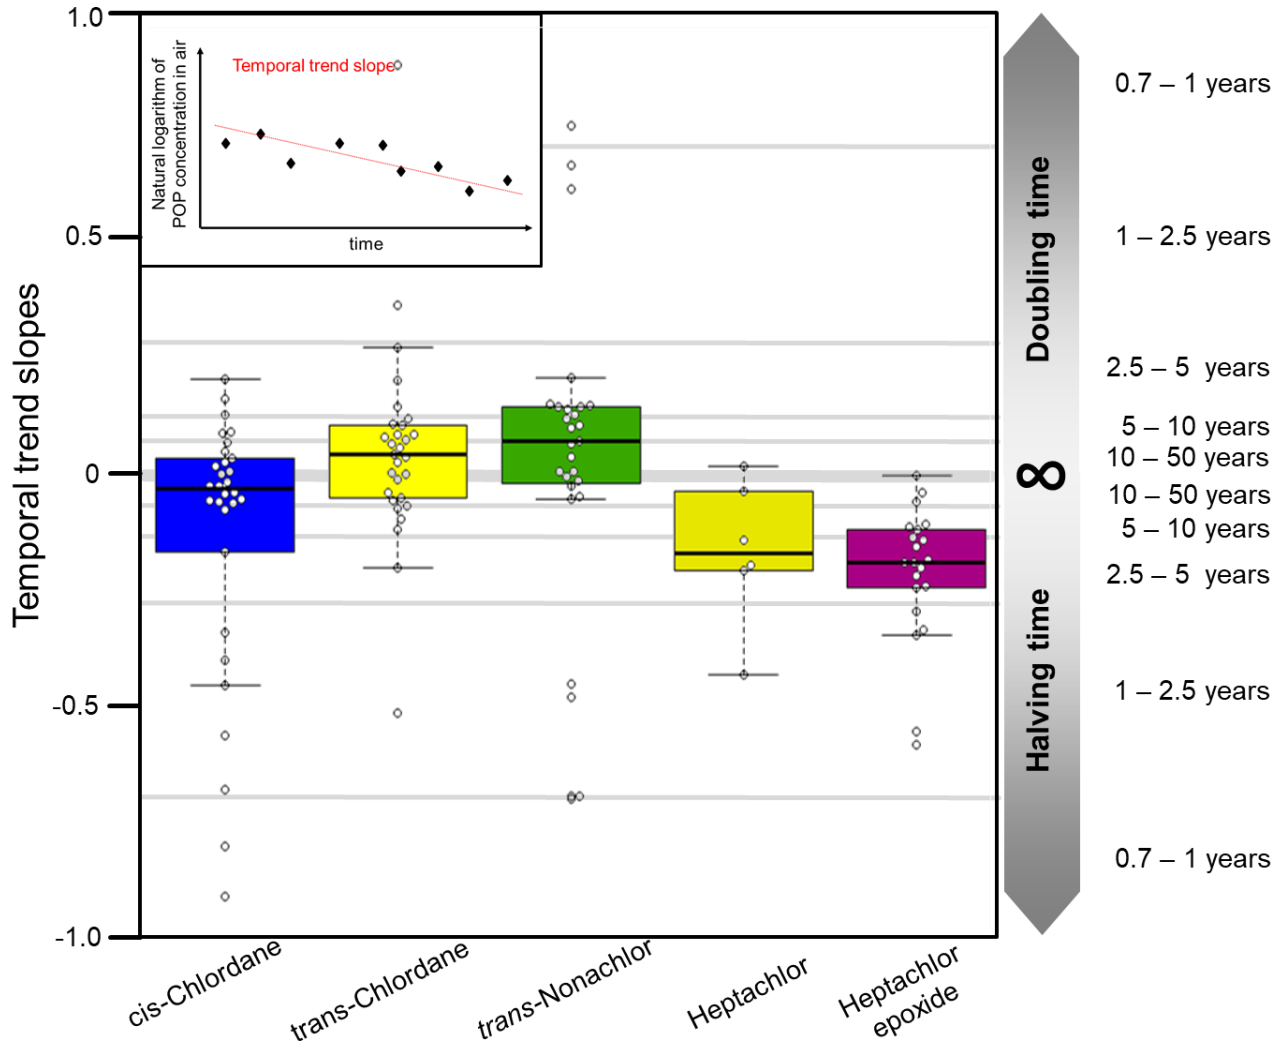

**Table S1. Halving times of POPs in air reported from other studies**

The majority of previous studies report declining trends and halving times for POPs in air. Where doubling times are reported, they are marked with (\*).

| Project                                                                                                                             | Region           | Site type  | Compound                     | Halving/doubling* time [years] |
|-------------------------------------------------------------------------------------------------------------------------------------|------------------|------------|------------------------------|--------------------------------|
| Monitoring of POPs with high volume air samplers at Alert, Pallas, Storhofdi, Zeppelin 1993-2011<br>Hung et al., 2016 <sup>10</sup> | WEOG             | polar      | PCBs                         | 3.6 – 31*                      |
|                                                                                                                                     |                  |            | $\alpha/\gamma$ -HCH         | 4.1-7.7                        |
|                                                                                                                                     |                  |            | <i>cis</i> -Chlordane        | 12-17                          |
|                                                                                                                                     |                  |            | <i>trans</i> -Chlordane      | 5.9-11                         |
|                                                                                                                                     |                  |            | <i>trans</i> -Nonachlor      | 13-19                          |
|                                                                                                                                     |                  |            | Dieldrin                     | 12-28                          |
|                                                                                                                                     |                  |            | Endosulfan I                 | 37                             |
| Monitoring with high volume air samplers in the Great Lakes area 1991-2014, IADN<br>Salamova et al., 2015 <sup>11</sup>             | WEOG             | urban      | PCBs                         | 12 - 19                        |
|                                                                                                                                     |                  |            | $\alpha/\gamma$ -HCH         | 3.9 - 4.1                      |
|                                                                                                                                     |                  |            | <i>cis/trans</i> -Chlordanes | 9.0 - 12                       |
|                                                                                                                                     |                  |            | Endosulfan I/II              | 6.4 - 8.3                      |
|                                                                                                                                     |                  | background | PCBs                         | 12.9 - 16.3                    |
|                                                                                                                                     |                  |            | $\alpha/\gamma$ -HCH         | 3.5 - 4.5                      |
|                                                                                                                                     |                  |            | <i>cis/trans</i> -Chlordanes | 8.7 - 11.7                     |
| Endosulfan I/II                                                                                                                     | 7.1 - 8.9        |            |                              |                                |
| Monitoring with medium-volume air sampler on the Tibetan Plateau 2008-2014<br>Wang et al., 2018 <sup>12</sup>                       | Asia and Pacific | background | $\alpha$ -HCH                | 6.1 ± 2.5                      |
|                                                                                                                                     |                  |            | $\gamma$ -HCH                | 108 ± 63                       |
|                                                                                                                                     |                  |            | PCB 28                       | increasing                     |
|                                                                                                                                     |                  |            | PCB 52                       | increasing                     |

SI - Tracking POPs in Global Air from the first 10 years of the GAPS Network (2005 to 2014)

| Project                                                                                                                                   | Region   | Site type  | Compound                     | Halving/doubling* time [years] |
|-------------------------------------------------------------------------------------------------------------------------------------------|----------|------------|------------------------------|--------------------------------|
| Monitoring with high volume air samplers at two EMEP sites Råö and Pallas 1996-2012<br>Anttila et al., 2016 <sup>13</sup>                 | WEOG     | rural      | PCBs                         | 15 - 27                        |
|                                                                                                                                           |          |            | $\alpha/\gamma$ -HCH         | 10 - 12                        |
|                                                                                                                                           |          |            | <i>cis/trans</i> -Chlordanes | 15-17                          |
|                                                                                                                                           |          |            | <i>trans</i> -Nonachlor      | 19                             |
|                                                                                                                                           |          | background | PCBs                         | 12 - 43                        |
|                                                                                                                                           |          |            | $\alpha/\gamma$ -HCH         | 10 - 12                        |
| Monitoring with high volume air samplers in the Canadian Great Lakes Basin 1992-2012, IADN<br>Shunthirasingham et al., 2016 <sup>14</sup> | WEOG     | background | <i>cis/trans</i> -Chlordanes | 17-21                          |
|                                                                                                                                           |          |            | <i>trans</i> -Nonachlor      | 20                             |
|                                                                                                                                           |          |            | PCBs                         | 9-39                           |
|                                                                                                                                           |          |            | $\alpha/\gamma$ -HCH         | 4-5                            |
|                                                                                                                                           |          |            | Endosulfan I                 | 13                             |
|                                                                                                                                           |          |            | Endosulfan II                | 9-11                           |
|                                                                                                                                           |          |            | Endosulfan SO <sub>4</sub>   | 8-10                           |
|                                                                                                                                           |          |            | <i>cis/trans</i> -Chlordanes | 10-34                          |
|                                                                                                                                           |          |            | <i>trans</i> -Nonachlor      | 12 - 52                        |
|                                                                                                                                           |          |            | Heptachlor                   | 5.3 - 8.6                      |
| Heptachlor epoxide                                                                                                                        | 5.8 - 12 |            |                              |                                |
| Passive air sampling of POPs in West Antarctica 2011-2017<br>Hao et al., 2019 <sup>15</sup>                                               | WEOG     | polar      | PCBs                         | 2.0                            |
|                                                                                                                                           |          |            | $\alpha/\gamma$ -HCH         | 2.0                            |
|                                                                                                                                           |          |            | Endosulfan I/II              | 1.2                            |
| High-volume air samplers under the TOMPS network UK 1991-2012<br>Graf et al., 2016 <sup>16</sup>                                          | WEOG     | urban      | PCBs                         | 3.9 - 6.6                      |
|                                                                                                                                           |          | rural      | PCBs                         | 5.6 - 7.5                      |

SI - Tracking POPs in Global Air from the first 10 years of the GAPS Network (2005 to 2014)

| Project                                                                                                           | Region    | Site type        | Compound                     | Halving/doubling* time [years] |
|-------------------------------------------------------------------------------------------------------------------|-----------|------------------|------------------------------|--------------------------------|
| Comparison of passive (MONET) and high volume air samplers (EMEP) 2012 – 2016<br>Kalina et al. 2019 <sup>17</sup> | Europe    | background       | PCBs                         | 2 – 118*                       |
|                                                                                                                   |           |                  | $\alpha/\gamma$ -HCH         | 2 – 20                         |
| Passive air sampling in African countries (MONET) 2008-2019<br>White et al. 2020 <sup>18</sup>                    | Africa    | background-urban | PCBs                         | 3 – 18                         |
|                                                                                                                   |           |                  | $\alpha/\gamma$ -HCH         | 2.3 – 23                       |
|                                                                                                                   |           |                  | <i>cis/trans</i> -Chlordanes | 2.6 – 100*                     |
|                                                                                                                   |           |                  | Heptachlor                   | 2.1 – 6.5*                     |
|                                                                                                                   |           |                  | Dieldrin                     | 0.9 – 22*                      |
|                                                                                                                   |           |                  | Endosulfan I/II              | 0.9 – 17*                      |
| Endosulfan SO <sub>4</sub>                                                                                        | 1.0 – 3.7 |                  |                              |                                |

Figure S13. Global concentrations and decline trends of  $\Sigma_7\text{PCB}$  2005-2014

The plot represents the geometric mean concentration for the 20 GAPS sites with long term monitoring. Declining (black) and increasing (red) concentrations over time are marked as arrows (scaled to the temporal trend slopes).

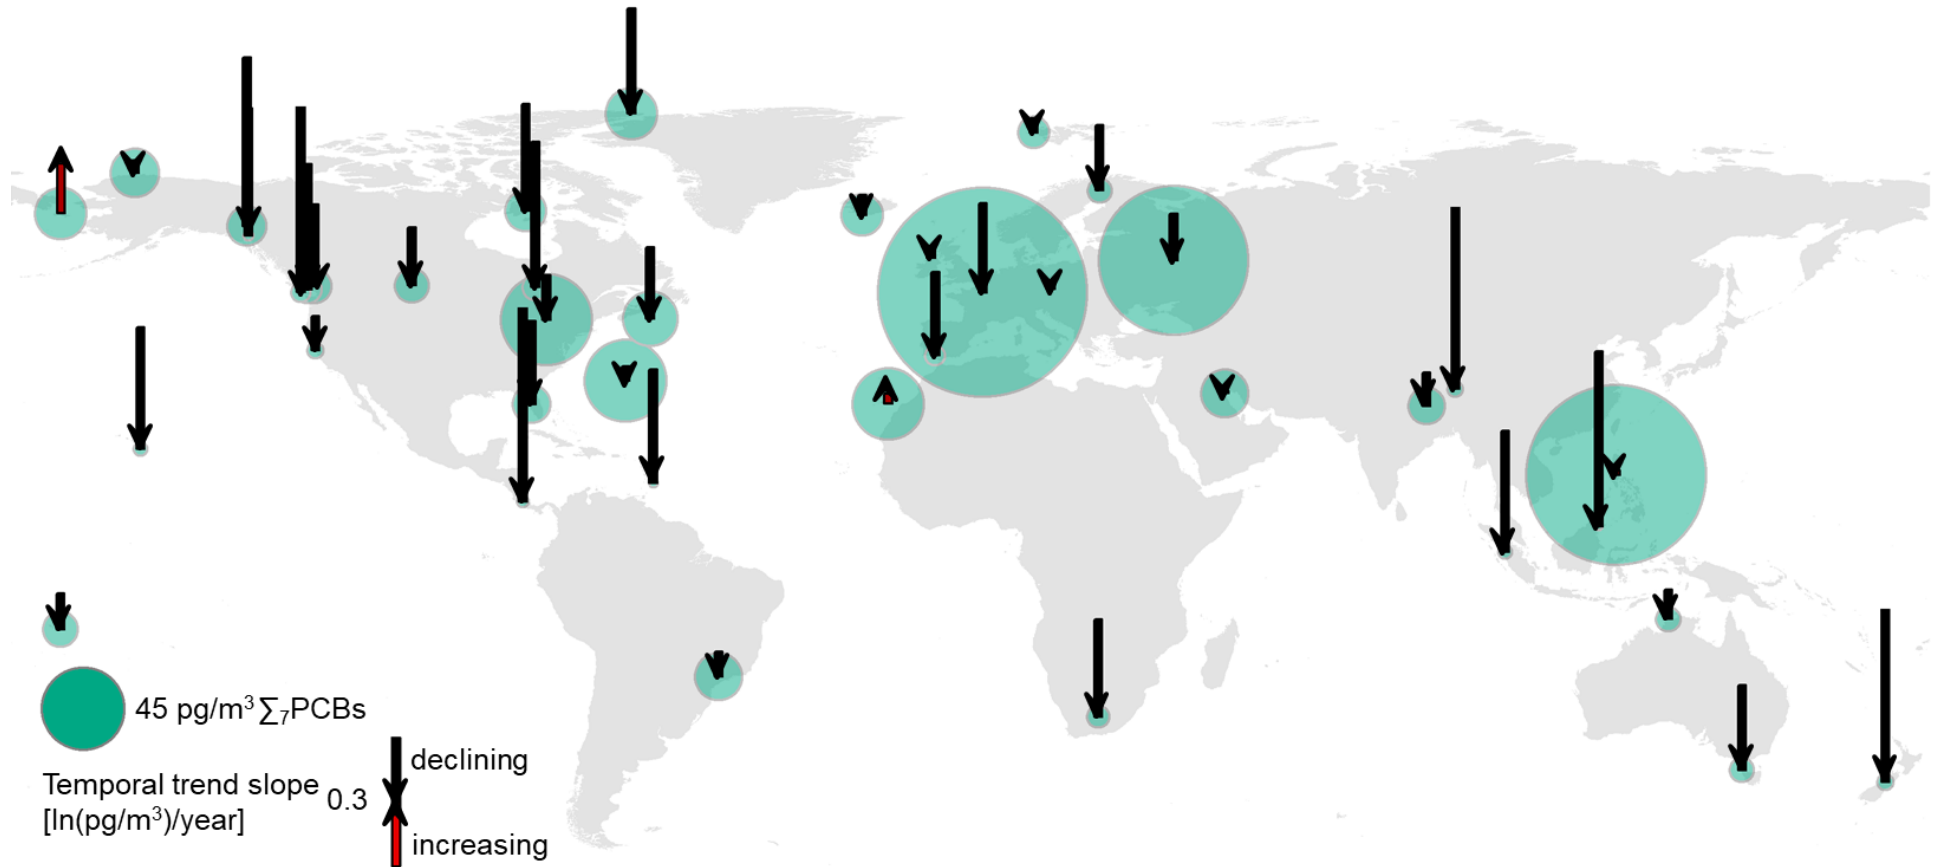

Figure S14. Global concentrations and decline trends of  $\alpha$ -HCH 2005-2014

The plot represents the geometric mean concentration for the 20 GAPS sites with long term monitoring. Declining (black) and increasing (red) concentrations over time are marked as arrows (scaled to the temporal trend slopes).

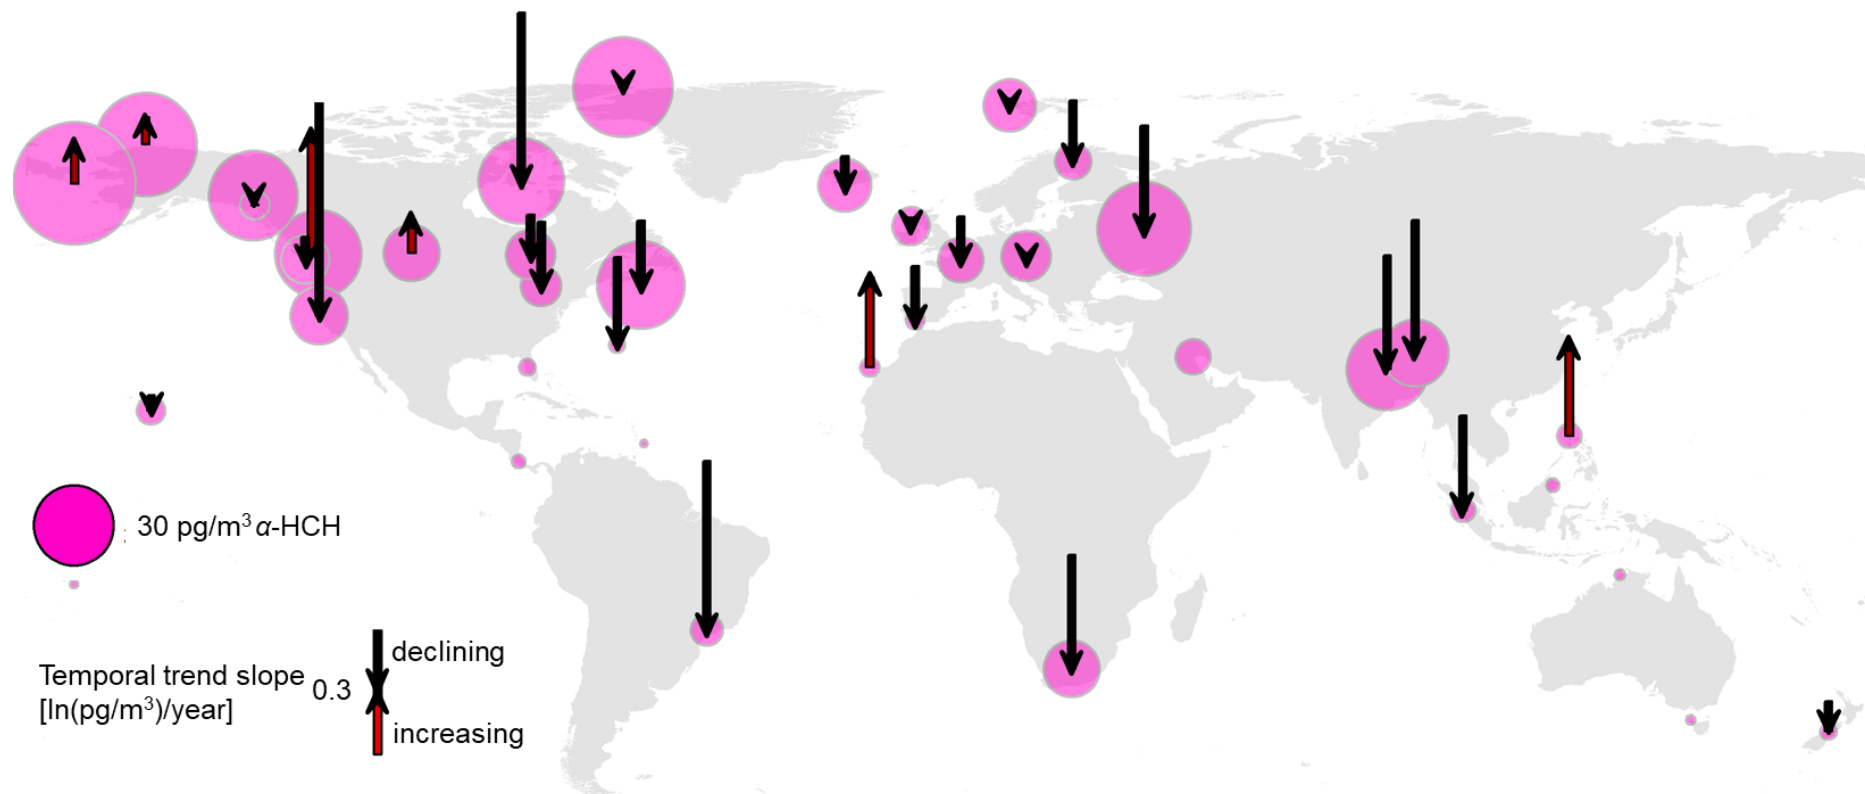



Figure S15. Global concentrations and decline trends of  $\gamma$ -HCH 2005-2014

The plot represents the geometric mean concentration for the 20 GAPS sites with long term monitoring. Declining (black) and increasing (red) concentrations over time are marked as arrows (scaled to the temporal trend slopes).

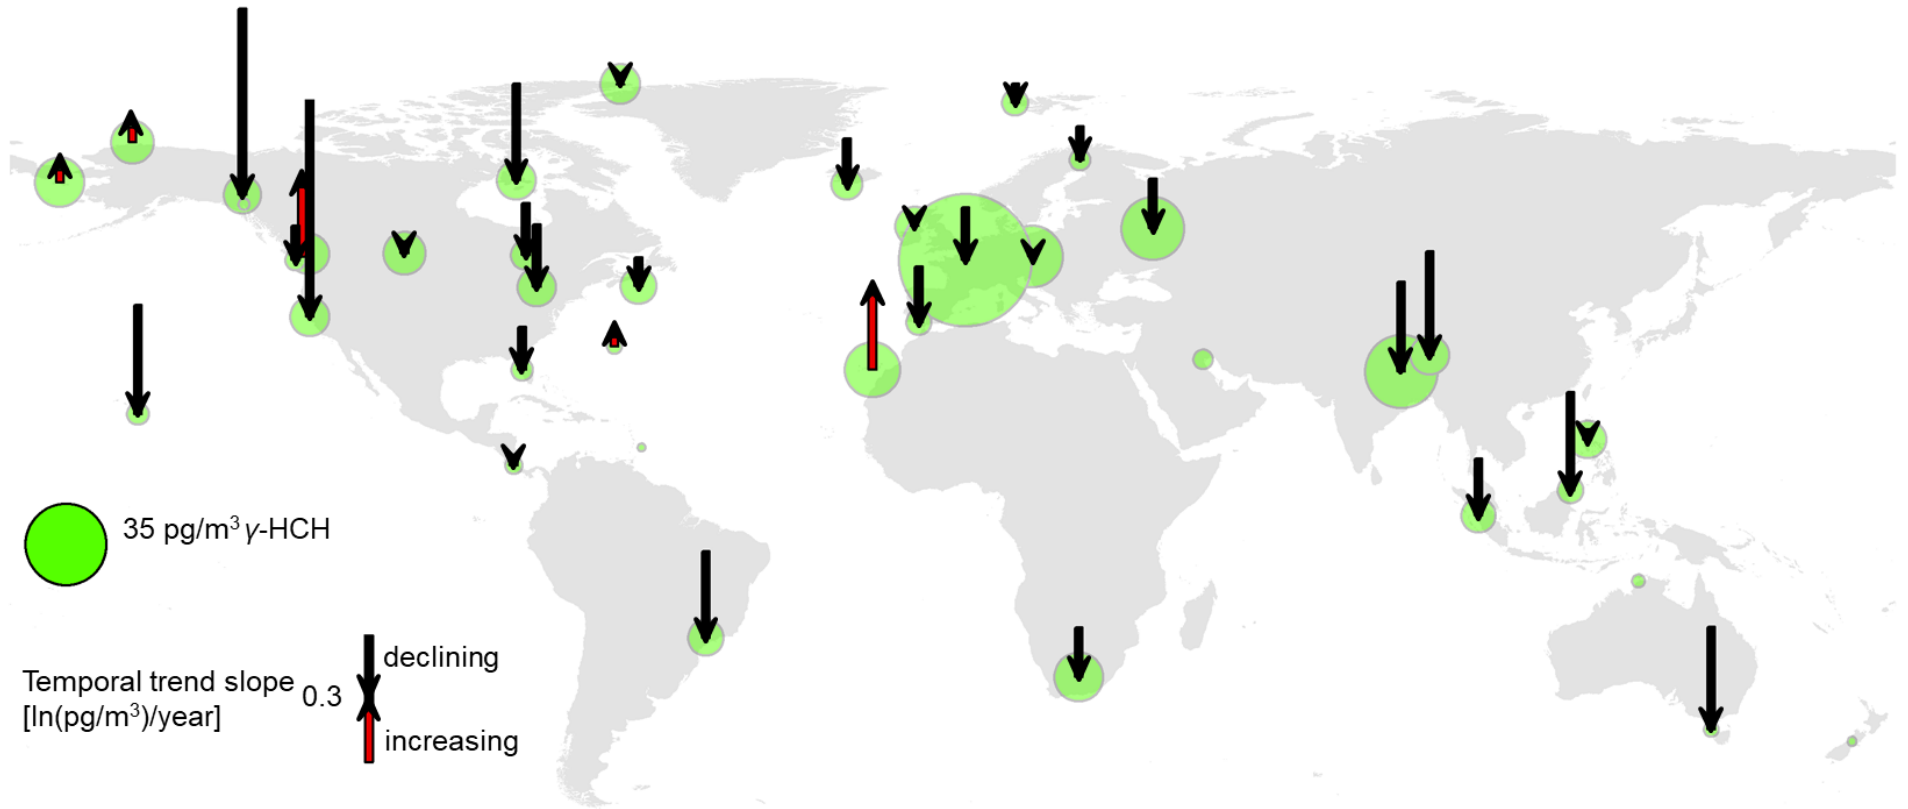

Figure S16. Global concentrations and decline trends of Endosulfan I 2005-2014

The plot represents the geometric mean concentration for the 20 GAPS sites with long term monitoring. Declining (black) and increasing (red) concentrations over time are marked as arrows (scaled to the temporal trend slopes).

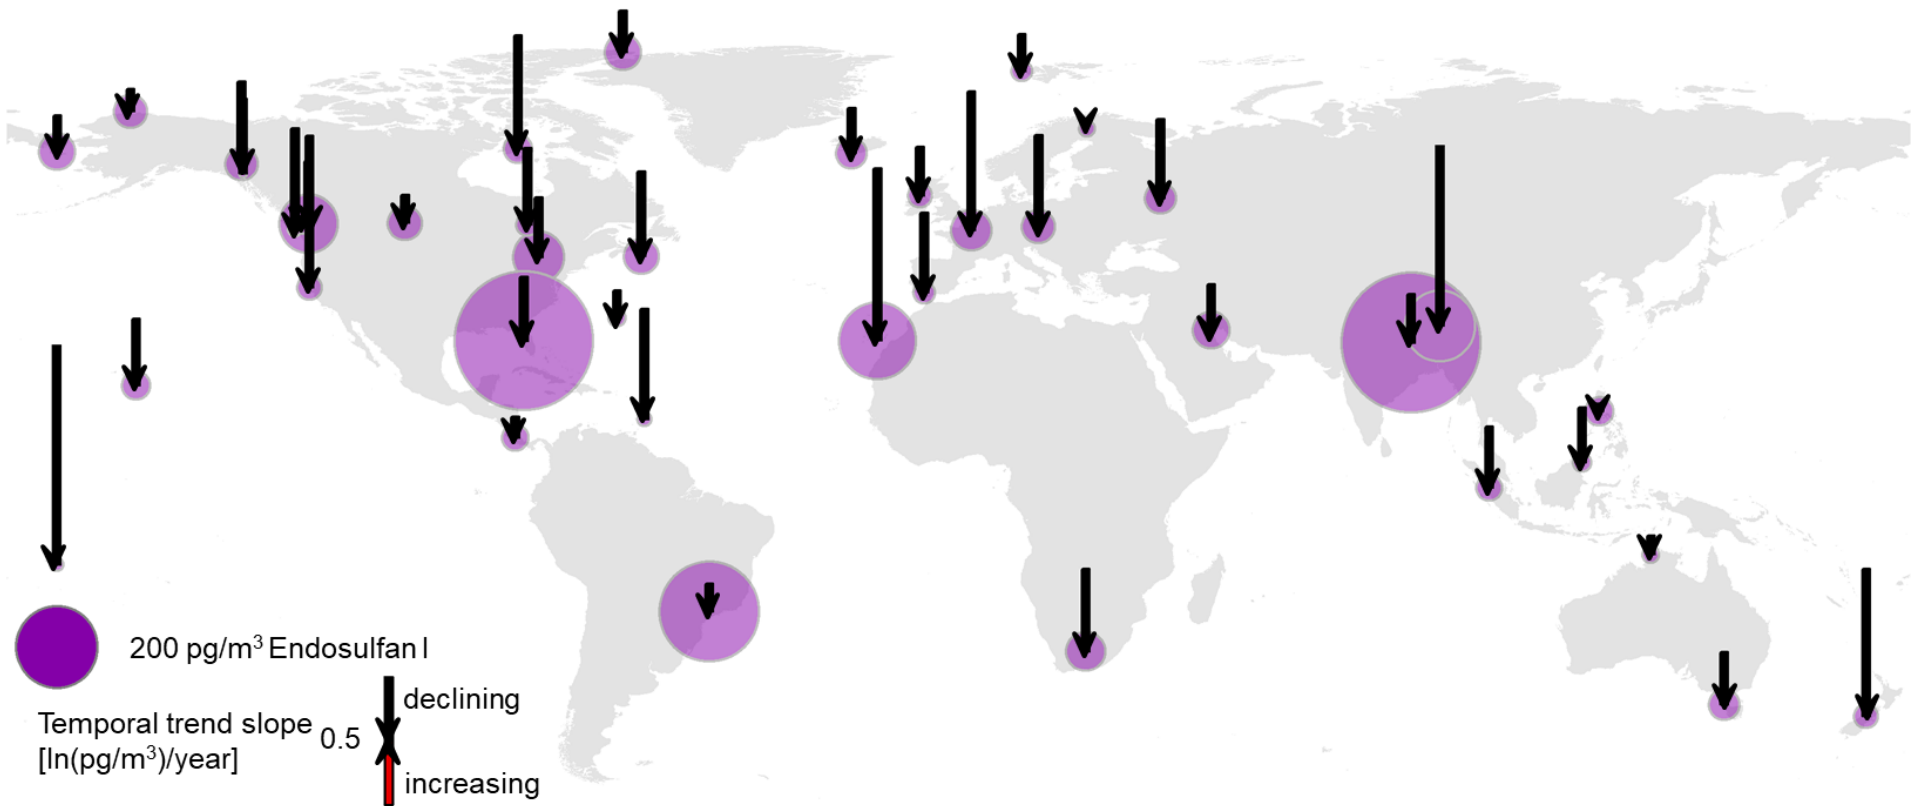

Figure S17. Global concentrations and decline trends of Endosulfan II 2005-2014

The plot represents the geometric mean concentration for the 20 GAPS sites with long term monitoring. Declining (black) and increasing (red) concentrations over time are marked as arrows (scaled to the temporal trend slopes).

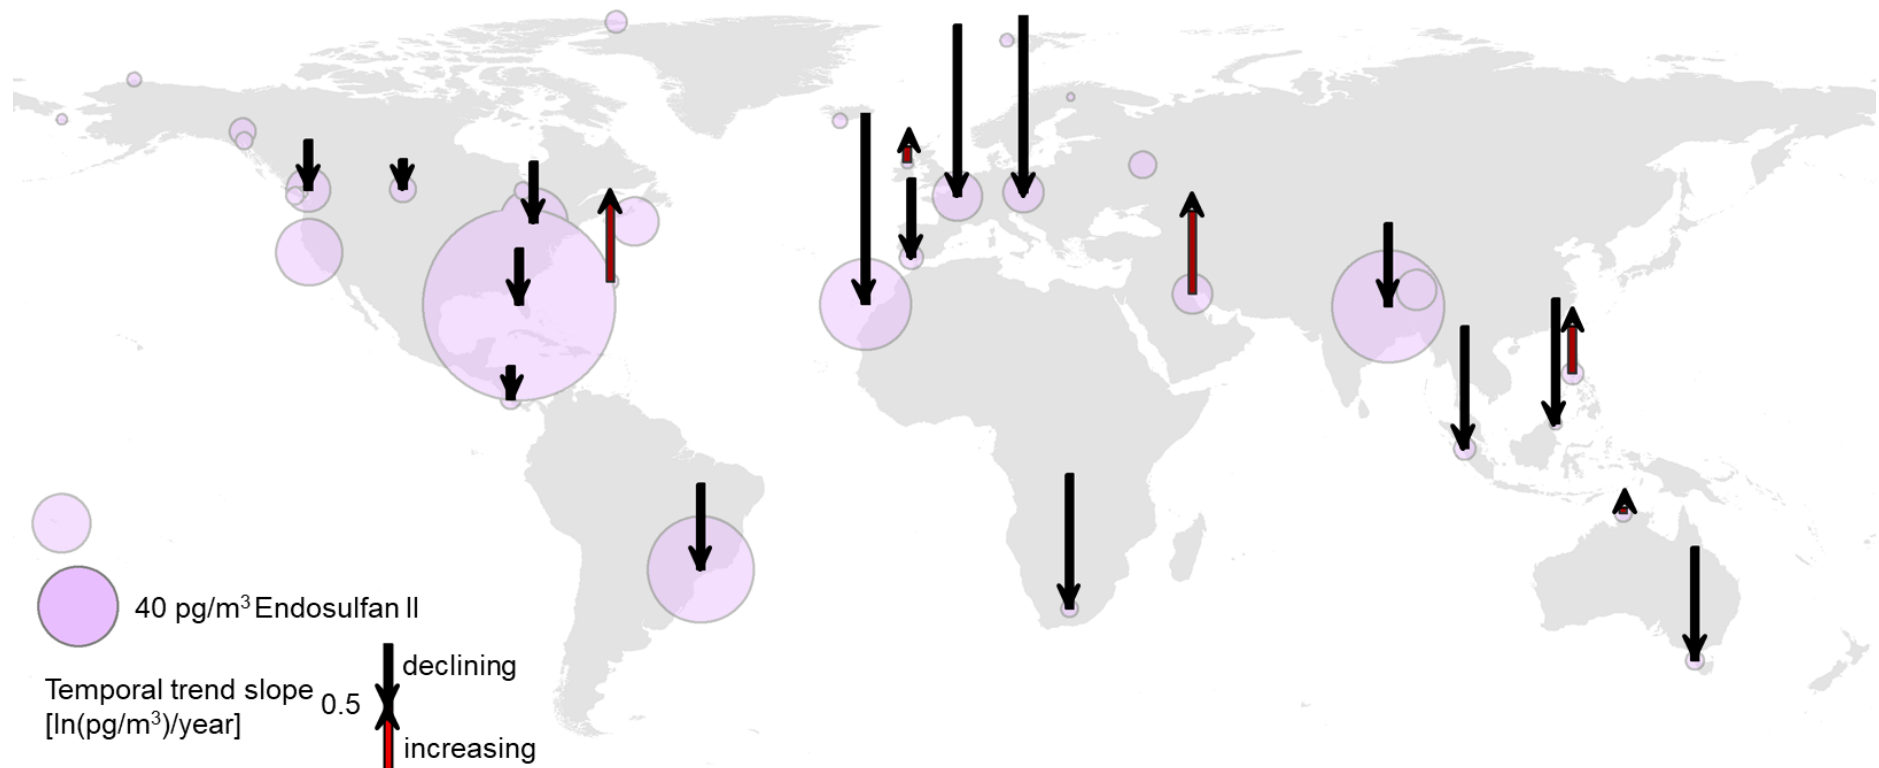

Figure S18. Global concentrations and decline trends of Endosulfan SO<sub>4</sub> 2005-2014

The plot represents the geometric mean concentration for the 20 GAPS sites with long term monitoring. Declining (black) and increasing (red) concentrations over time are marked as arrows (scaled to the temporal trend slopes).

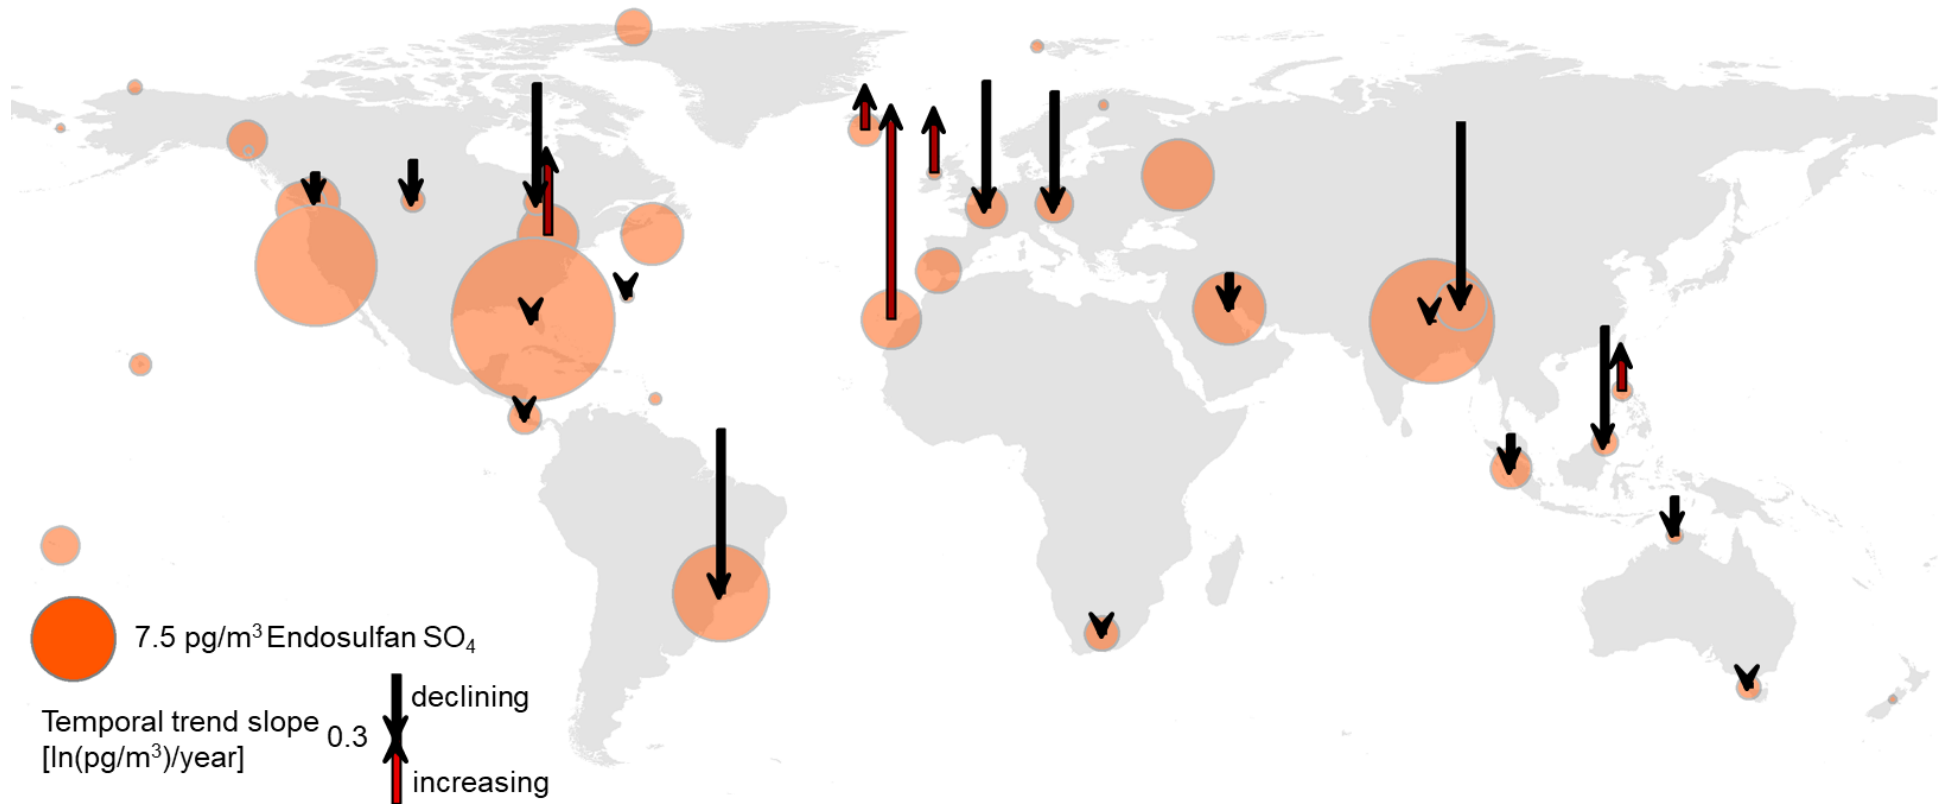

Figure S19. Global concentrations and decline trends of Dieldrin 2005-2014

The plot represents the geometric mean concentration for the 20 GAPS sites with long term monitoring. Declining (black) and increasing (red) concentrations over time are marked as arrows (scaled to the temporal trend slopes).

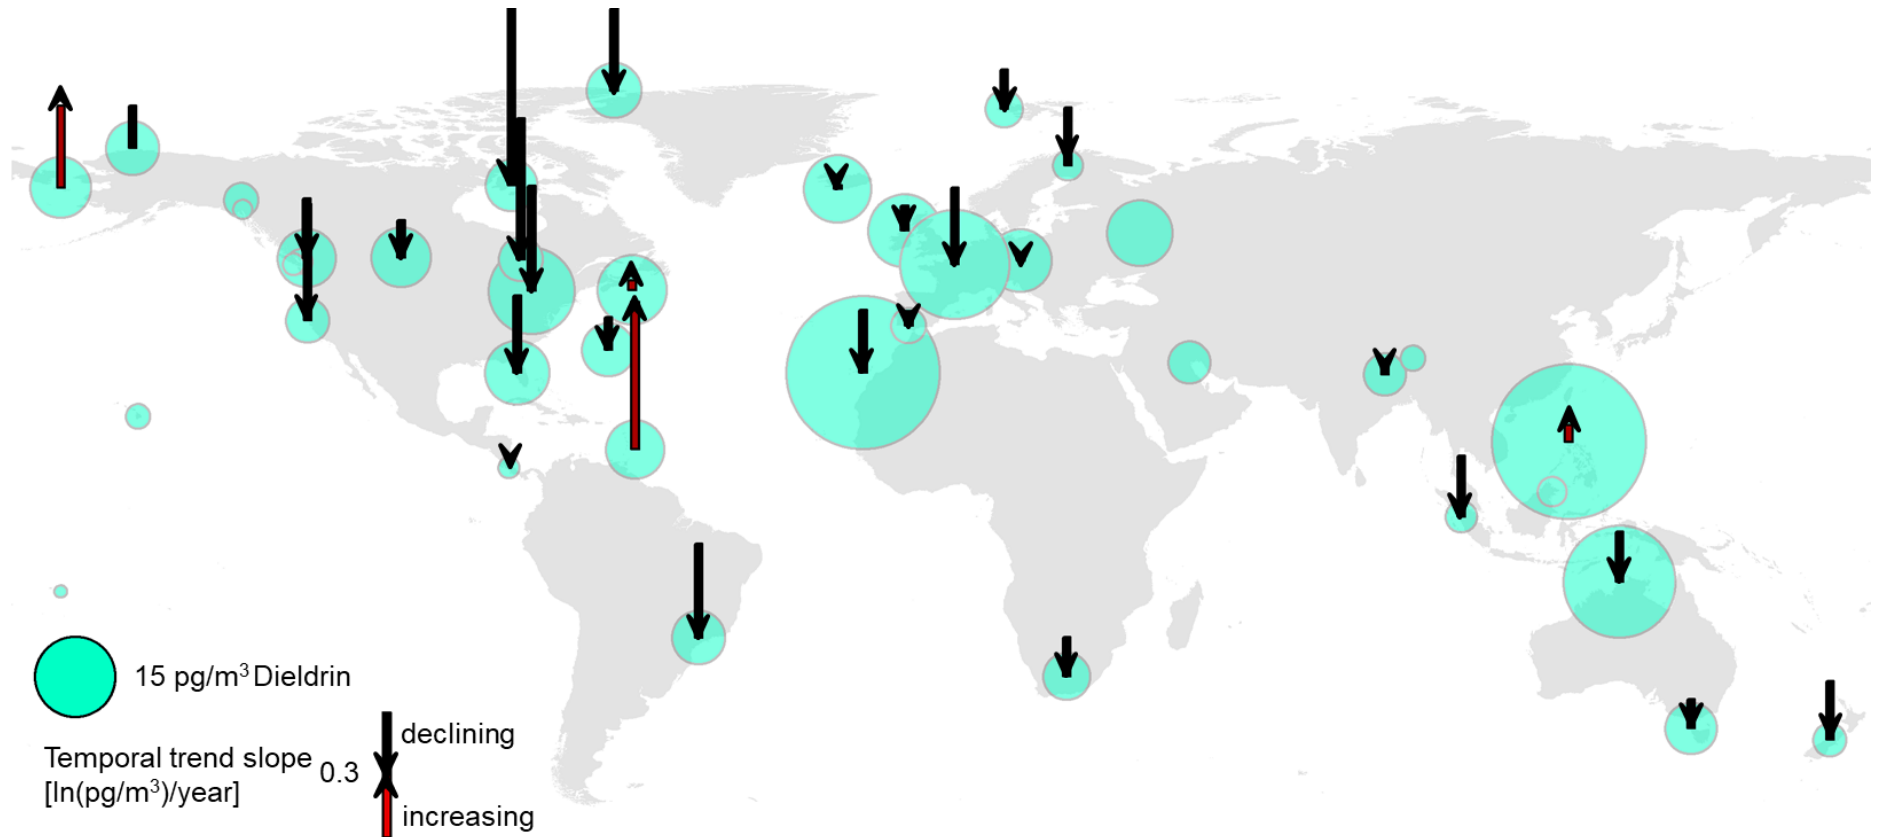

Figure S20. Global concentrations and decline trends of *cis*-Chlordane 2005-2014

The plot represents the geometric mean concentration for the 20 GAPS sites with long term monitoring. Declining (black) and increasing (red) concentrations over time are marked as arrows (scaled to the temporal trend slopes).

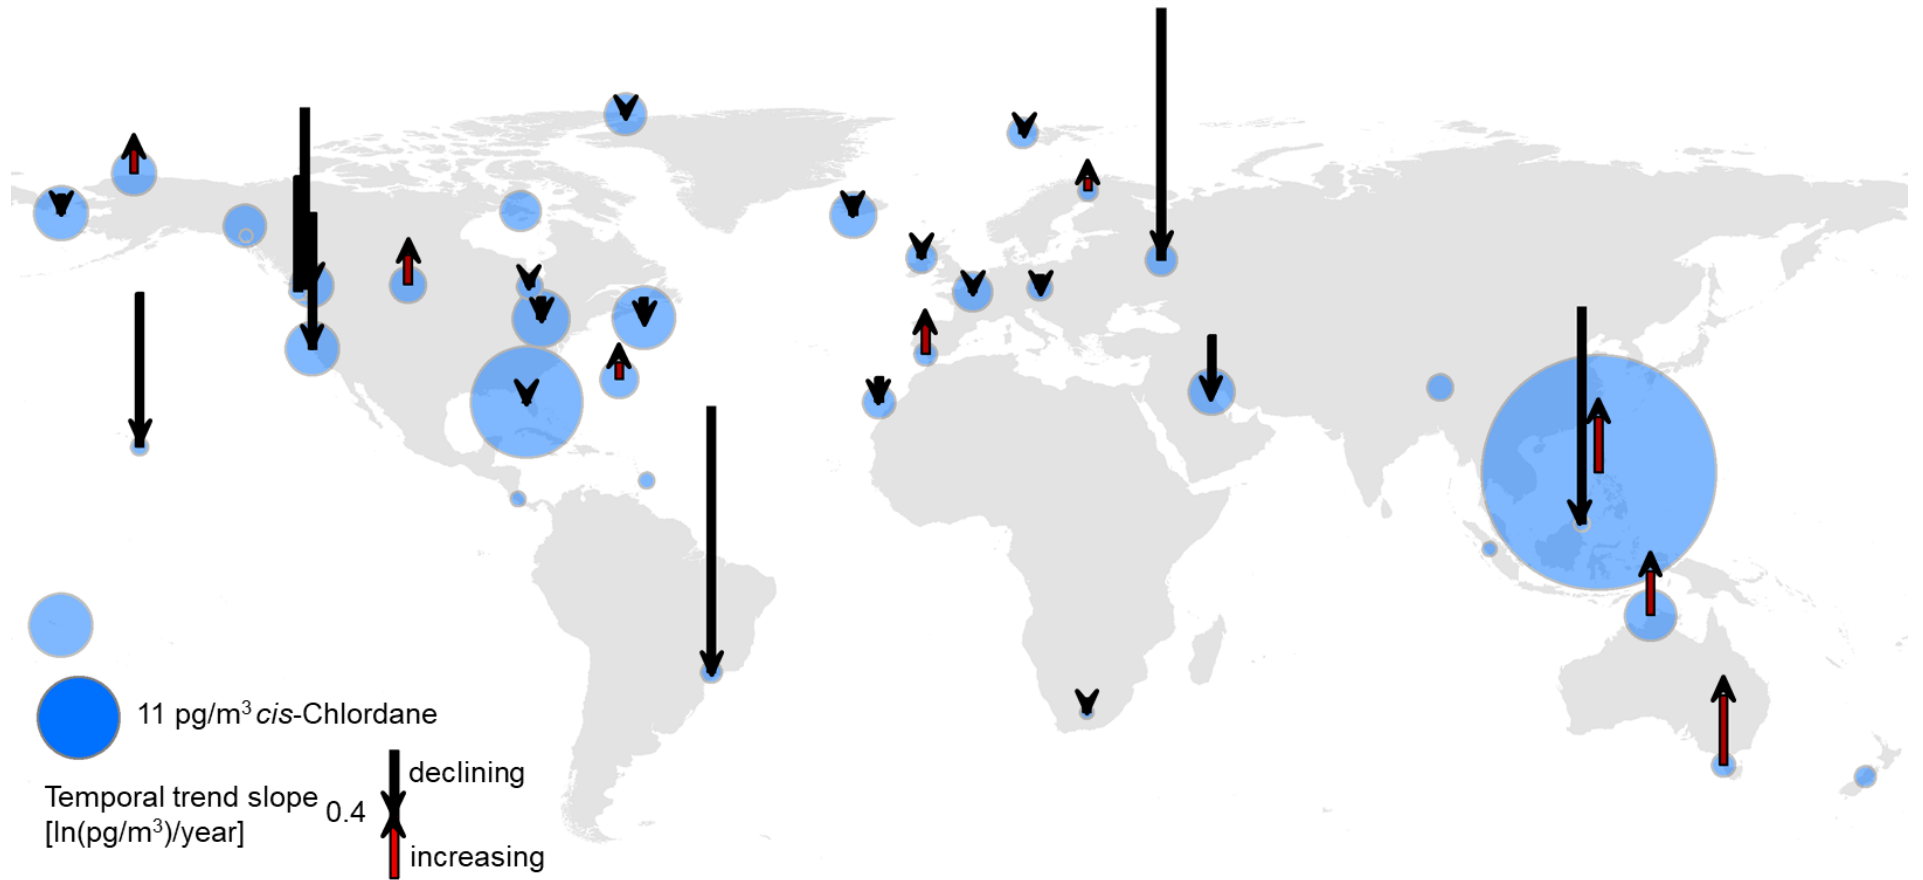

Figure S21. Global concentrations and decline trends of trans-Chlordane 2005-2014

The plot represents the geometric mean concentration for the 20 GAPS sites with long term monitoring. Declining (black) and increasing (red) concentrations over time are marked as arrows (scaled to the temporal trend slopes).

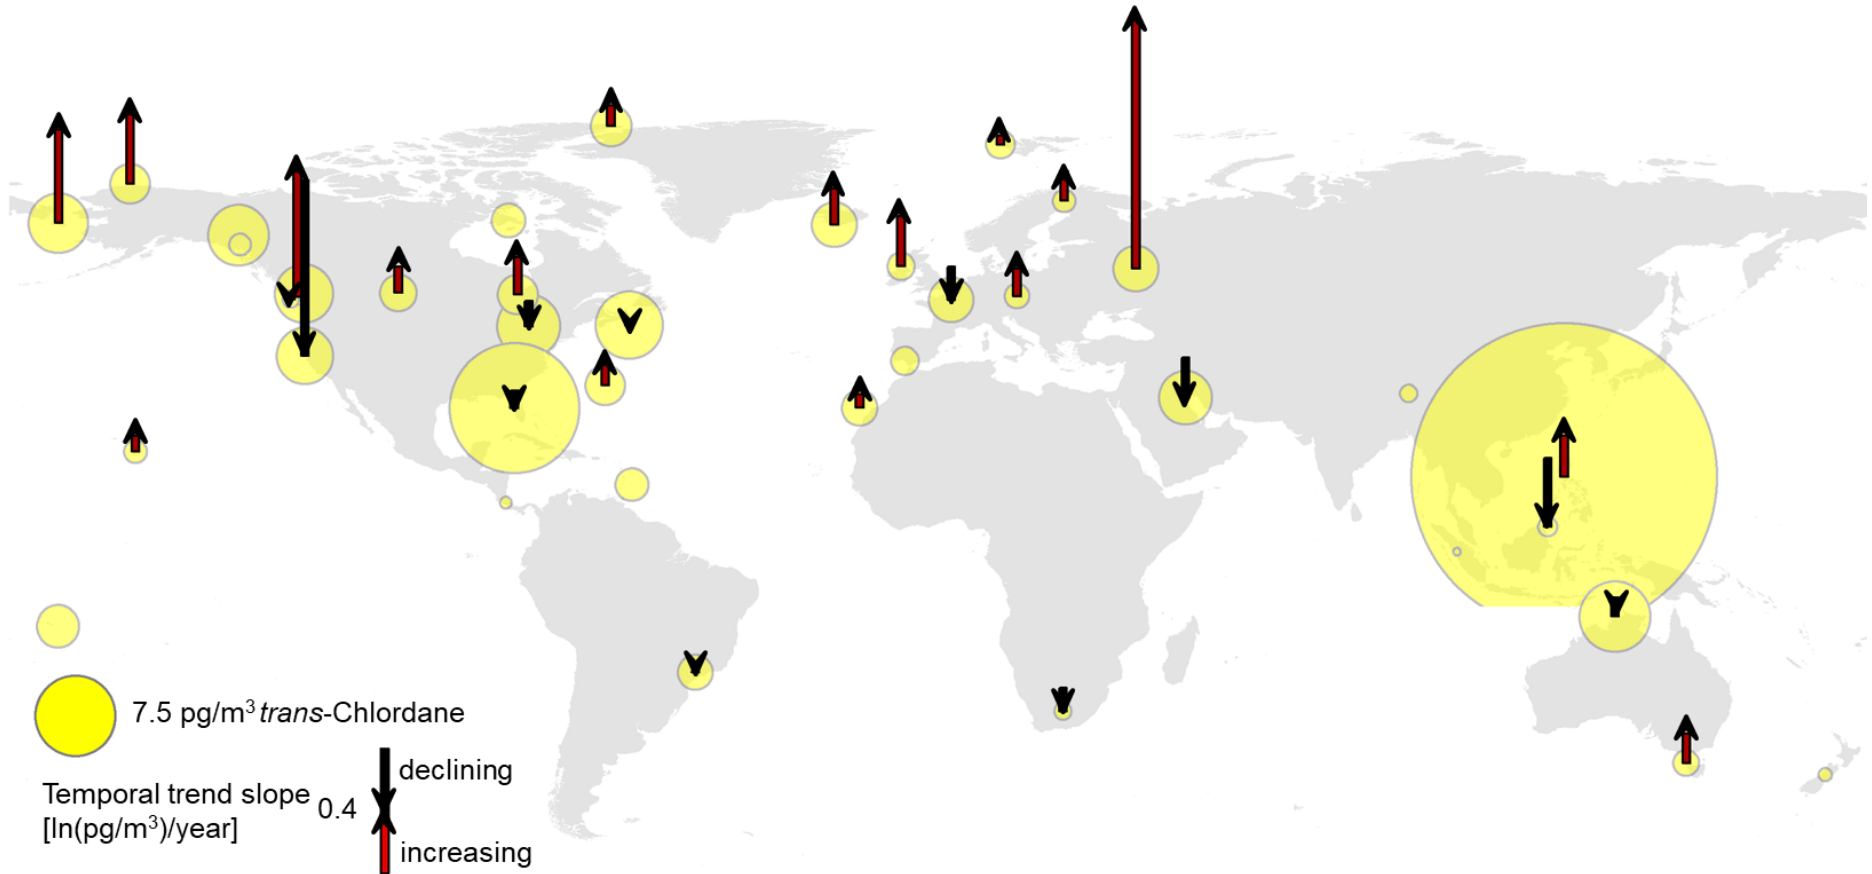

Figure S22. Global concentrations and decline trends of trans-Nonachlor 2005-2014

The plot represents the geometric mean concentration for the 20 GAPS sites with long term monitoring. Declining (black) and increasing (red) concentrations over time are marked as arrows (scaled to the temporal trend slopes).

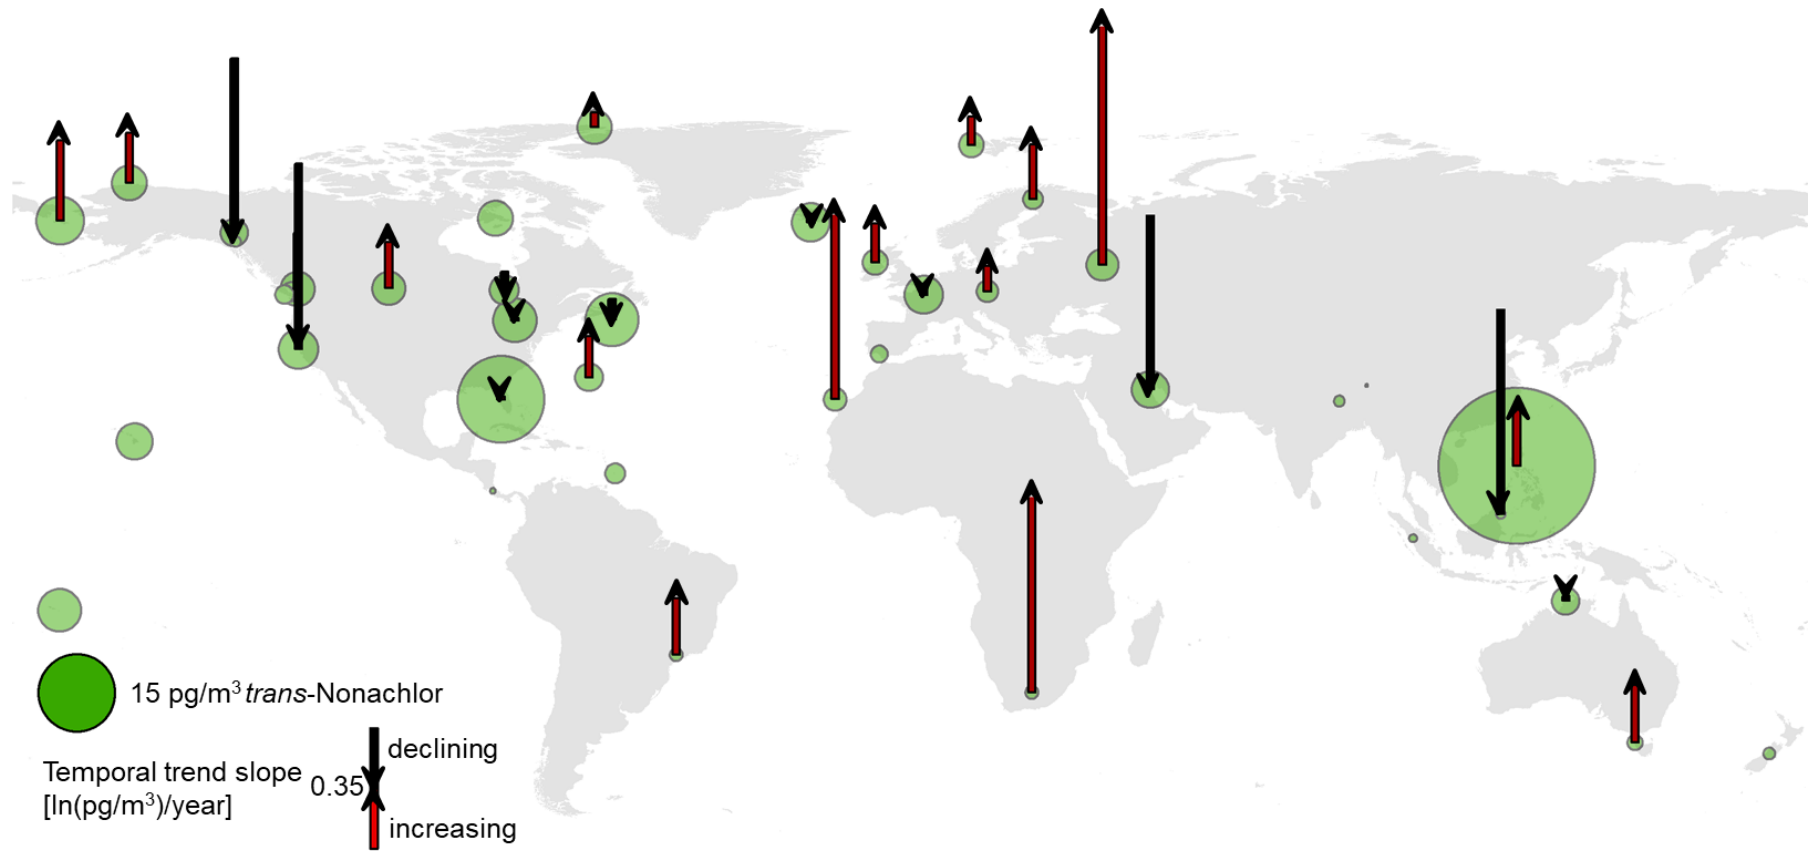



Figure S23. Global concentrations and decline trends of Heptachlor 2005-2014

The plot represents the geometric mean concentration for the 20 GAPS sites with long term monitoring. Declining (black) and increasing (red) concentrations over time are marked as arrows (scaled to the temporal trend slopes).

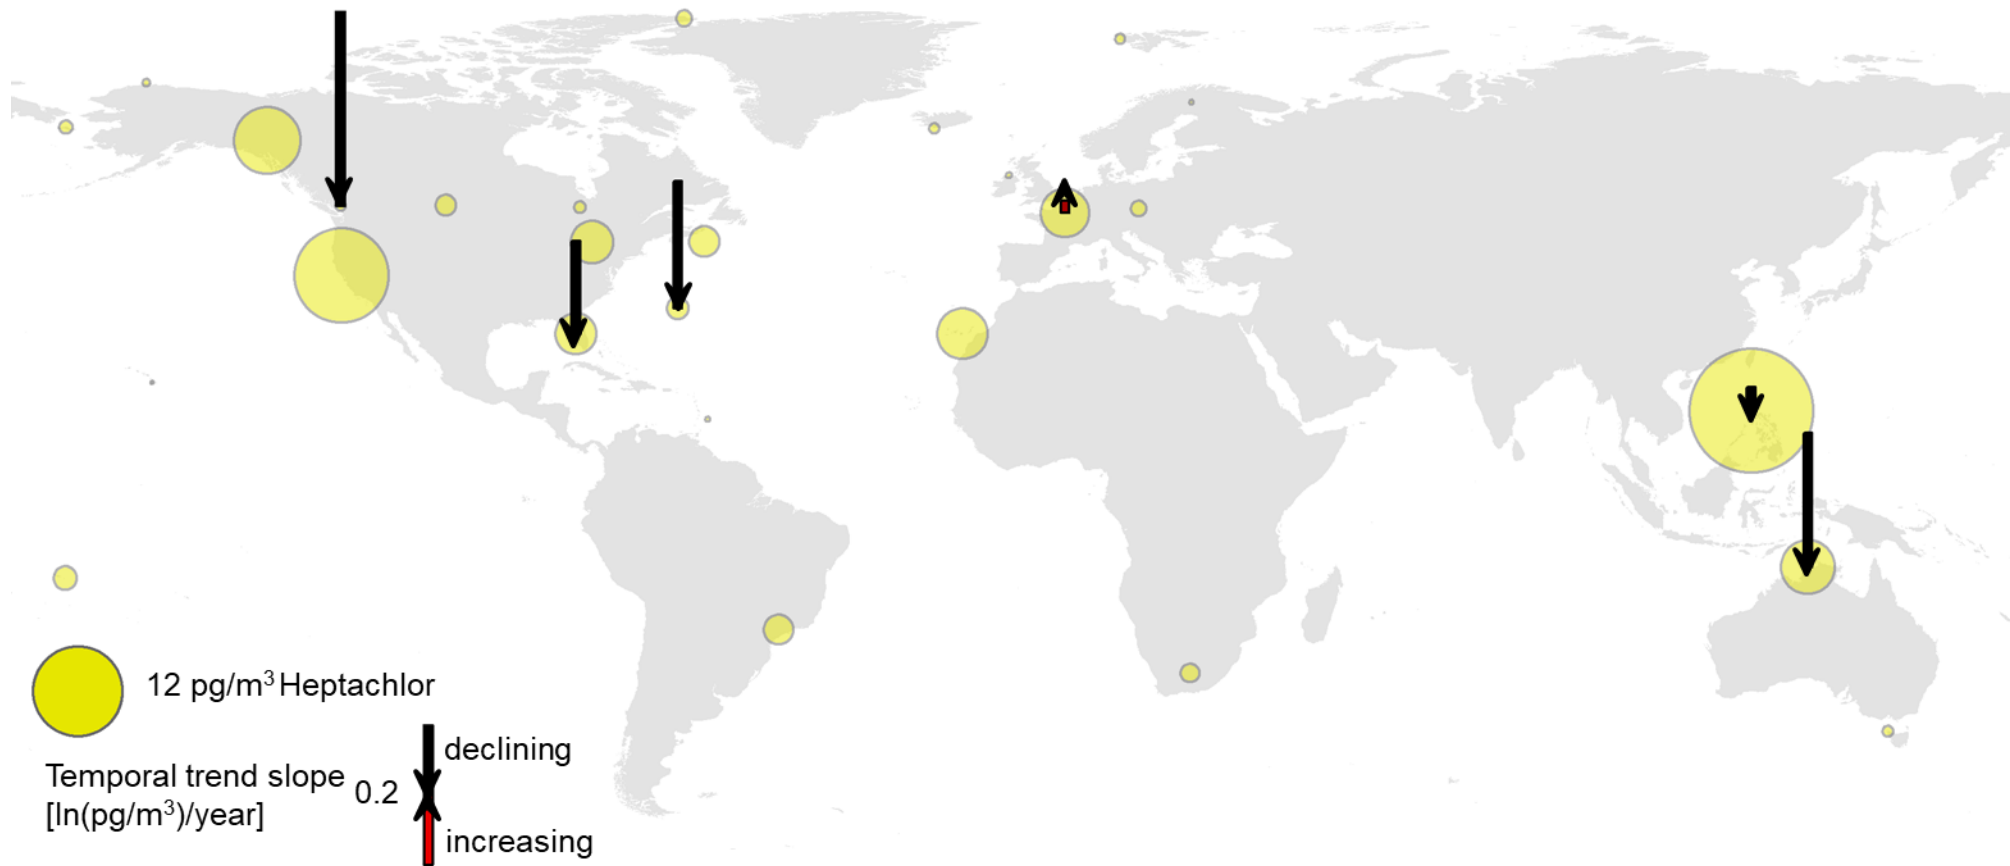

Figure S24. Global concentrations and decline trends of Heptachlor epoxide 2005-2014

The plot represents the geometric mean concentration for the 20 GAPS sites with long term monitoring. Declining (black) and increasing (red) concentrations over time are marked as arrows (scaled to the temporal trend slopes).

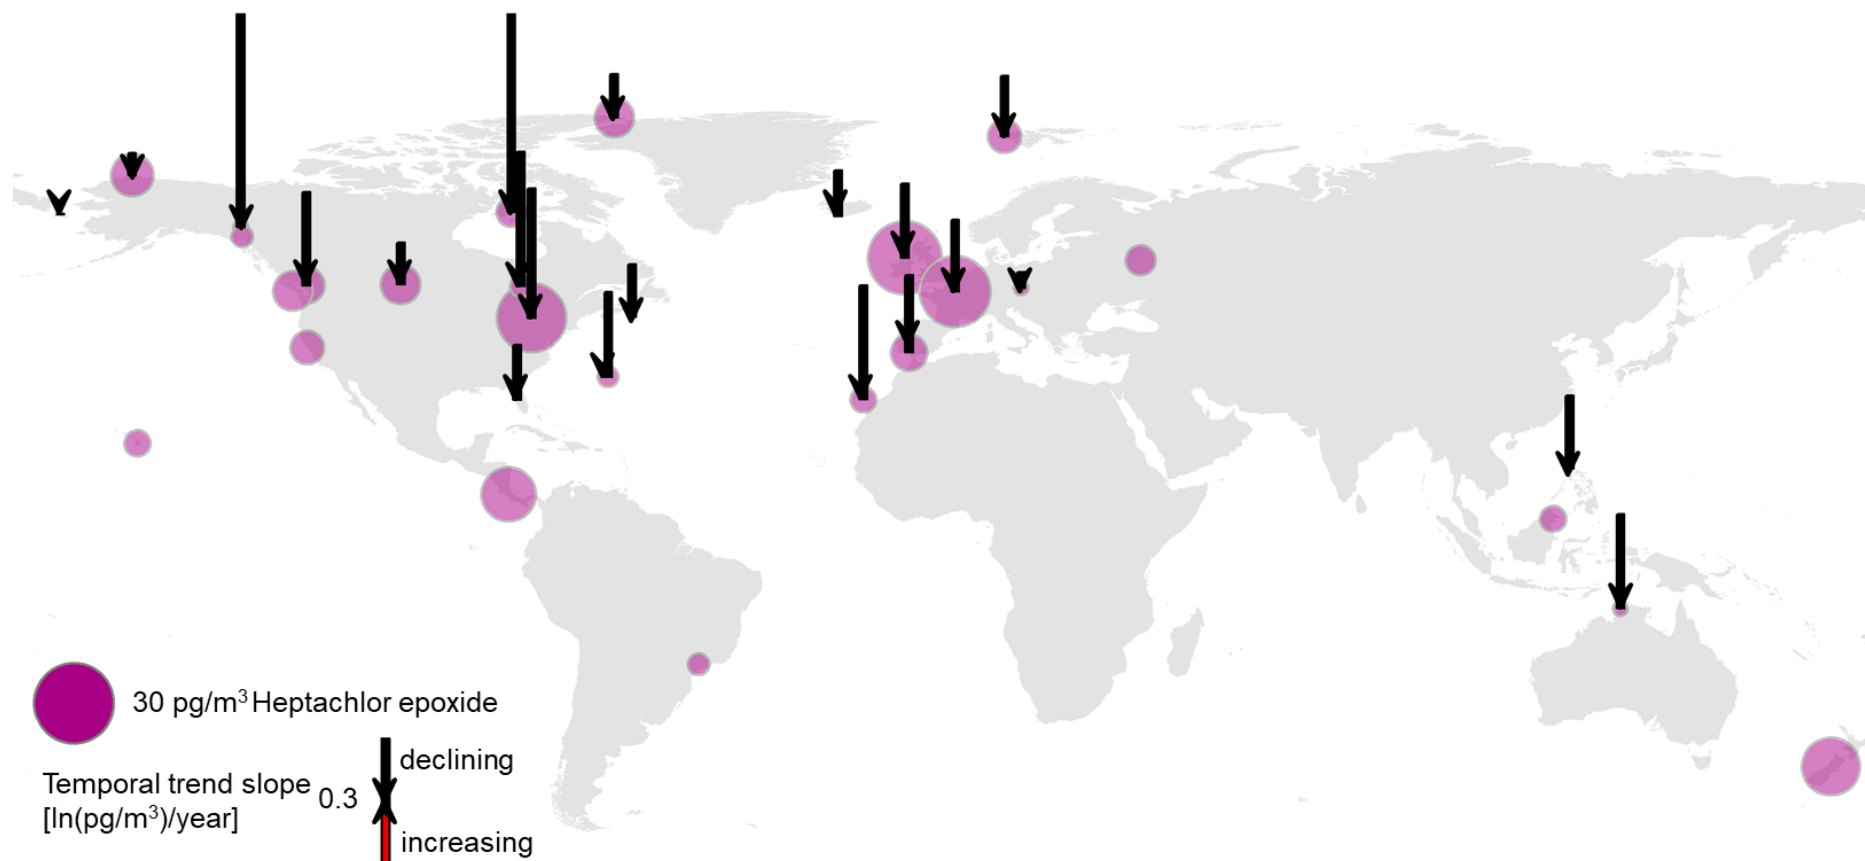

Table S2. Wilcoxon Rank Sum Test groupings of POPs based on temporal trends

p-values below 0.05 (white cells) indicate that temporal trends between compared compounds are significantly different.

|                            | $\alpha$ -HCH | <i>cis</i> -Chlordane | Dieldrin | Endosulfan I | Endosulfan II | Endosulfan SO <sub>4</sub> | $\gamma$ -HCH | Heptachlor | Heptachlor epoxide | $\Sigma_7$ PCB | <i>trans</i> -Chlordane | <i>trans</i> -Nonachlor |
|----------------------------|---------------|-----------------------|----------|--------------|---------------|----------------------------|---------------|------------|--------------------|----------------|-------------------------|-------------------------|
| $\alpha$ -HCH              | x             | 6.1E-01               | 1.6E-01  | 2.8E-05      | 5.0E-02       | 7.8E-01                    | 5.0E-01       | 3.5E-01    | 5.5E-03            | 1.2E-02        | 4.8E-03                 | 1.0E-02                 |
| <i>cis</i> -Chlordane      | 6.1E-01       | x                     | 1.3E-01  | 6.3E-04      | 1.7E-01       | 8.6E-01                    | 2.0E-01       | 3.5E-01    | 1.3E-02            | 2.2E-02        | 5.0E-02                 | 2.1E-02                 |
| Dieldrin                   | 1.6E-01       | 1.3E-01               | x        | 9.3E-03      | 1.9E-01       | 2.0E-01                    | 4.6E-01       | 7.5E-01    | 1.9E-01            | 3.5E-01        | 1.6E-04                 | 1.9E-03                 |
| Endosulfan I               | 2.8E-05       | 6.3E-04               | 9.3E-03  | x            | 8.2E-01       | 8.6E-04                    | 1.5E-04       | 2.5E-01    | 2.6E-01            | 1.0E-01        | 7.3E-10                 | 2.8E-06                 |
| Endosulfan II              | 5.0E-02       | 1.7E-01               | 1.9E-01  | 8.2E-01      | x             | 8.4E-02                    | 8.6E-02       | 5.7E-01    | 6.4E-01            | 5.5E-01        | 2.1E-03                 | 1.8E-02                 |
| Endosulfan SO <sub>4</sub> | 7.8E-01       | 8.6E-01               | 2.0E-01  | 8.6E-04      | 8.4E-02       | x                          | 4.6E-01       | 4.1E-01    | 2.0E-02            | 4.2E-02        | 4.0E-02                 | 4.2E-02                 |
| $\gamma$ -HCH              | 5.0E-01       | 2.0E-01               | 4.6E-01  | 1.5E-04      | 8.6E-02       | 4.6E-01                    | x             | 5.5E-01    | 2.3E-02            | 5.3E-02        | 1.9E-04                 | 1.6E-03                 |
| Heptachlor                 | 3.5E-01       | 3.5E-01               | 7.5E-01  | 2.5E-01      | 5.7E-01       | 4.1E-01                    | 5.5E-01       | x          | 6.4E-01            | 6.4E-01        | 1.9E-02                 | 5.0E-02                 |
| Heptachlor epoxide         | 5.5E-03       | 1.3E-02               | 1.9E-01  | 2.6E-01      | 6.4E-01       | 2.0E-02                    | 2.3E-02       | 6.4E-01    | x                  | 7.2E-01        | 1.6E-06                 | 1.5E-04                 |
| $\Sigma_7$ PCB             | 1.2E-02       | 2.2E-02               | 3.5E-01  | 1.0E-01      | 5.5E-01       | 4.2E-02                    | 5.3E-02       | 6.4E-01    | 7.2E-01            | x              | 1.6E-06                 | 5.0E-05                 |
| <i>trans</i> -Chlordane    | 4.8E-03       | 5.0E-02               | 1.6E-04  | 7.3E-10      | 2.1E-03       | 4.0E-02                    | 1.9E-04       | 1.9E-02    | 1.6E-06            | 1.6E-06        | x                       | 5.5E-01                 |
| <i>trans</i> -Nonachlor    | 1.0E-02       | 2.1E-02               | 1.9E-03  | 2.8E-06      | 1.8E-02       | 4.2E-02                    | 1.6E-03       | 5.0E-02    | 1.5E-04            | 5.0E-05        | 5.5E-01                 | x                       |

## Figure S25. PCA of the temporal trends slopes of all congeners

Principle component analysis (PCA) was applied to the temporal trend slopes at the individual sites (n=29, sites with <50% data were excluded from the PCA)

Figure S25a. Scores plot

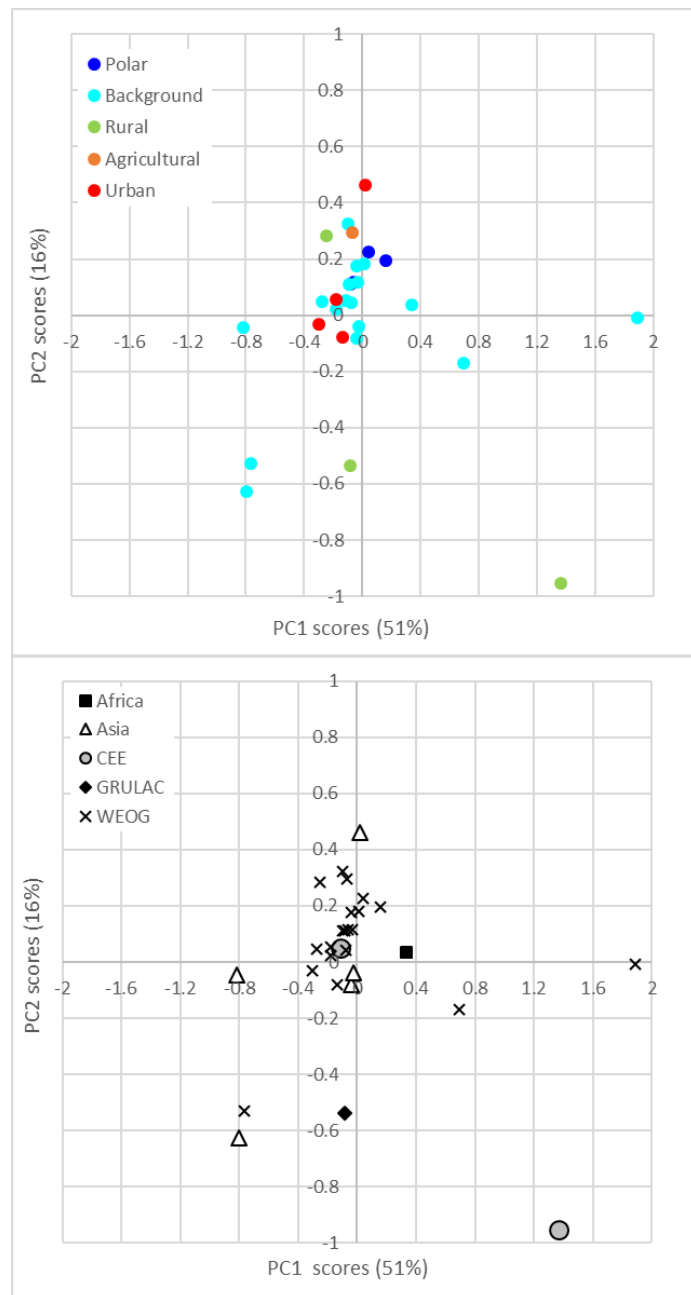

Figure S25a. Loadings plot

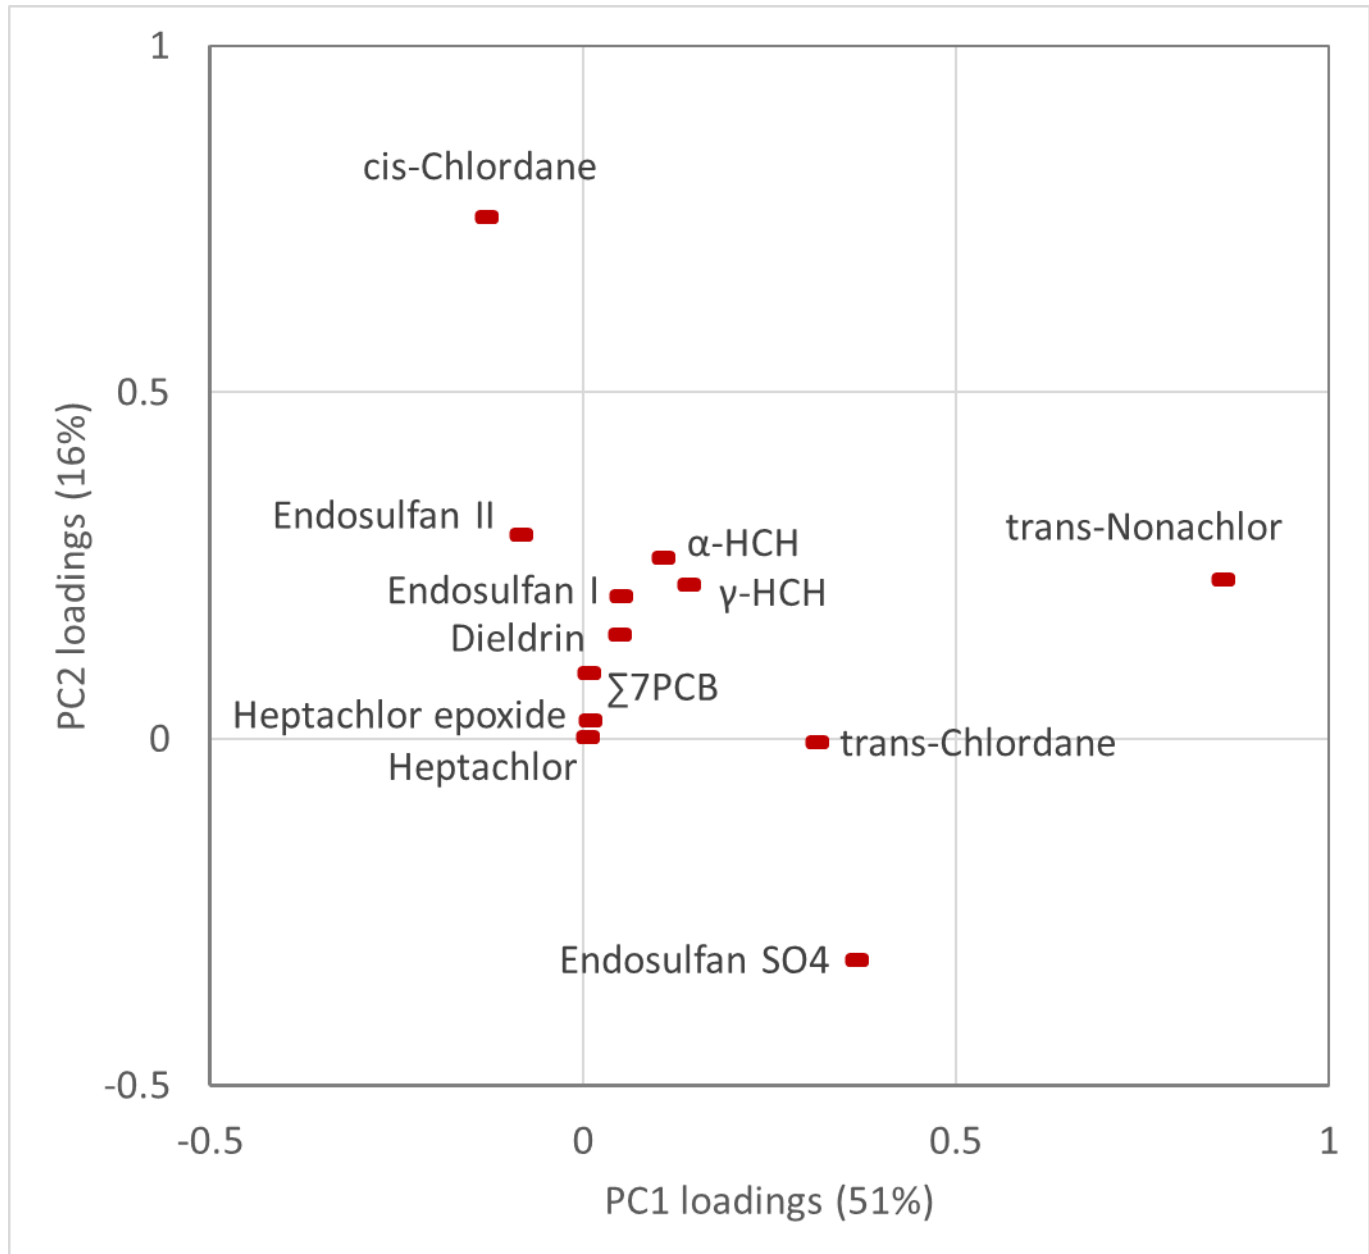

## References

1. Kobayashi, T.; Tateishi, R.; Alsaaidh, B.; Sharma, R. C.; Wakaizumi, T.; Miyamoto, D.; Bai, X.; Long, B. D.; Gegentana, G.; Maitiniyazi, A.; Shirahata, T.; Mi, L.; Iizuka, K.; Yusupujiang, A.; Rinawan, F. R.; Bhattarai, R.; Dong, P., Production of Global Land Cover Data—GLCNMO2013. *Journal of Geography and Geology* **2017**, *9*, (3).
2. Pozo, K.; Harner, T.; Wania, F.; Muir, D. C.; Jones, K. C.; Barrie, L. A., Toward a global network for persistent organic pollutants in air: results from the GAPS study. *Environmental science & technology* **2006**, *40*, (16), 4867-4873.
3. Herkert, N. J.; Martinez, A.; Hornbuckle, K. C., A Model Using Local Weather Data to Determine the Effective Sampling Volume for PCB Congeners Collected on Passive Air Samplers. *Environmental Science & Technology* **2016**, *50*, (13), 6690-6697.
4. Herkert, N. J.; Spak, S. N.; Smith, A.; Schuster, J. K.; Harner, T.; Martinez, A.; Hornbuckle, K. C., Calibration and evaluation of PUF-PAS sampling rates across the Global Atmospheric Passive Sampling (GAPS) network. *Environmental Science: Processes & Impacts* **2018**.
5. The University of Iowa PUF-PAS Sampling Rate Model Interface. [http://s-iuhr41.iuhr.uiowa.edu/pufpas\\_model/](http://s-iuhr41.iuhr.uiowa.edu/pufpas_model/) (January 2020),
6. Moeckel, C.; Harner, T.; Nizzetto, L.; Strandberg, B.; Lindroth, A.; Jones, K. C., Use of deuration compounds in passive air samplers: Results from active sampling-supported field deployment, potential uses, and recommendations. *Environmental science & technology* **2009**, *43*, (9), 3227-3232.
7. National Oceanic and Atmospheric Administration (NOAA) Integrated Surface Hourly Database (ISH/ISD) Ver2. <https://www.ncdc.noaa.gov/has/HAS.FileAppRouter?datasetname=3505v2&subqueryby=STATION&aplname=&oudest=FILE> (April 2020),
8. Harner, T. 2014\_GAPS Template for calculating PUF and SIP disk sample air volumes\_November 6. (January 2020),
9. Shoeib, M.; Harner, T., Characterization and comparison of three passive air samplers for persistent organic pollutants. *Environmental science & technology* **2002**, *36*, (19), 4142-4151.
10. Hung, H.; Katsoyiannis, A. A.; Brorström-Lundén, E.; Olafsdottir, K.; Aas, W.; Breivik, K.; Bohlin-Nizzetto, P.; Sigurdsson, A.; Hakola, H.; Bossi, R.; Skov, H.; Sverko, E.; Barresi, E.; Fellin, P.; Wilson, S., Temporal trends of Persistent Organic Pollutants (POPs) in arctic air: 20 years of monitoring under the Arctic Monitoring and Assessment Programme (AMAP). *Environmental Pollution* **2016**, *217*, 52-61.
11. Salamova, A.; Venier, M.; Hites, R. A., Revised Temporal Trends of Persistent Organic Pollutant Concentrations in Air around the Great Lakes. *Environmental Science & Technology Letters* **2015**, *2*, (2), 20-25.
12. Wang, C.; Wang, X.; Gong, P.; Yao, T., Long-term trends of atmospheric organochlorine pollutants and polycyclic aromatic hydrocarbons over the southeastern Tibetan Plateau. *Science of The Total Environment* **2018**, *624*, 241-249.
13. Anttila, P.; Brorström-Lundén, E.; Hansson, K.; Hakola, H.; Vestenius, M., Assessment of the spatial and temporal distribution of persistent organic pollutants (POPs) in the Nordic atmosphere. *Atmospheric Environment* **2016**, *140*, 22-33.
14. Shunthirasingham, C.; Gawor, A.; Hung, H.; Brice, K. A.; Su, K.; Alexandrou, N.; Dryfhout-Clark, H.; Backus, S.; Sverko, E.; Shin, C.; Park, R.; Noronha, R., Atmospheric concentrations and loadings of organochlorine pesticides and polychlorinated biphenyls in the Canadian Great Lakes Basin (GLB): Spatial and temporal analysis (1992–2012). *Environmental Pollution* **2016**, *217*, 124-133.
15. Hao, Y.; Li, Y.; Han, X.; Wang, T.; Yang, R.; Wang, P.; Xiao, K.; Li, W.; Lu, H.; Fu, J.; Wang, Y.; Shi, J.; Zhang, Q.; Jiang, G., Air monitoring of polychlorinated biphenyls, polybrominated diphenyl ethers and organochlorine pesticides in West Antarctica during 2011–2017: Concentrations, temporal trends and potential sources. *Environmental Pollution* **2019**, *249*, 381-389.

SI - Tracking POPs in Global Air from the first 10 years of the GAPS Network (2005 to 2014)

16. Graf, C.; Katsoyiannis, A.; Jones, K. C.; Sweetman, A. J., The TOMPs ambient air monitoring network – Continuous data on UK air quality for over 20 years. *Environmental Pollution* **2016**, *217*, 42-51.
17. Kalina, J.; White, K. B.; Scheringer, M.; Příbylová, P.; Kukučka, P.; Audy, O.; Klánová, J., Comparability of long-term temporal trends of POPs from co-located active and passive air monitoring networks in Europe. *Environmental Science: Processes & Impacts* **2019**, *21*, (7), 1132-1142.
18. White, K. B.; Kalina, J.; Scheringer, M.; Příbylová, P.; Kukučka, P.; Kohoutek, J.; Prokeš, R.; Klánová, J., Temporal Trends of Persistent Organic Pollutants across Africa after a Decade of MONET Passive Air Sampling. *Environmental Science & Technology* **2020**.
